# Supplementary material for: Hydroxychloroquine for prevention of recurrent miscarriage: study protocol for a multicentre randomised placebo-controlled trial BBQ study
Source: PubMed Central journal article supplement — BMJ Open. 2019 Mar 20;9(3):e025649. doi: 10.1136/bmjopen-2018-025649 (PMC6527997; doi:10.1136/bmjopen-2018-025649), 2019-03-20
Supplement: bmjopen-2018-025649.draft_revisions.pdf [file bmjopen-2018-025649.draft_revisions.pdf]

# BMJ Open

BMJ Open is committed to open peer review. As part of this commitment we make the peer review history of every article we publish publicly available.

When an article is published we post the peer reviewers' comments and the authors' responses online. We also post the versions of the paper that were used during peer review. These are the versions that the peer review comments apply to.

The versions of the paper that follow are the versions that were submitted during the peer review process. They are not the versions of record or the final published versions. They should not be cited or distributed as the published version of this manuscript.

BMJ Open is an open access journal and the full, final, typeset and author-corrected version of record of the manuscript is available on our site with no access controls, subscription charges or pay-per-view fees (<http://bmjopen.bmj.com>).

If you have any questions on BMJ Open's open peer review process please email [info.bmjopen@bmj.com](mailto:info.bmjopen@bmj.com)

# BMJ Open

## Hydroxychloroquine for Prevention of Recurrent Miscarriage: Study Protocol for a Multicenter Randomized Placebo Controlled Trial

|                               |                                                                                                                                                                                                                                                                                                                                                                                                                                                                                                                                                                                                                                                                                                                                                                                                                                                                                                            |
|-------------------------------|------------------------------------------------------------------------------------------------------------------------------------------------------------------------------------------------------------------------------------------------------------------------------------------------------------------------------------------------------------------------------------------------------------------------------------------------------------------------------------------------------------------------------------------------------------------------------------------------------------------------------------------------------------------------------------------------------------------------------------------------------------------------------------------------------------------------------------------------------------------------------------------------------------|
| Journal:                      | <i>BMJ Open</i>                                                                                                                                                                                                                                                                                                                                                                                                                                                                                                                                                                                                                                                                                                                                                                                                                                                                                            |
| Manuscript ID                 | bmjopen-2018-025649                                                                                                                                                                                                                                                                                                                                                                                                                                                                                                                                                                                                                                                                                                                                                                                                                                                                                        |
| Article Type:                 | Protocol                                                                                                                                                                                                                                                                                                                                                                                                                                                                                                                                                                                                                                                                                                                                                                                                                                                                                                   |
| Date Submitted by the Author: | 02-Aug-2018                                                                                                                                                                                                                                                                                                                                                                                                                                                                                                                                                                                                                                                                                                                                                                                                                                                                                                |
| Complete List of Authors:     | <p>Pasquier, Elisabeth; Brest Univ Hosp, EA 3878 de Saint-martin, Luc; EA 3878 Groupe d'Etude de la Thrombose de Bretagne Occidentale</p> <p>marhic, Gisèle; Centre d'Investigation Clinique-INSERM 1412</p> <p>Chaleur, Celine; University Hospital Bellevue, Thrombosis Research Group</p> <p>Bohec, Caroline; Hôpital François Mitterand, Division of Gynaecology</p> <p>Bretelle, Florence; Université de la Méditerranée, Hôpital Nord, Division of Gynaecology</p> <p>Lejeune-Saada, Véronique; Hôpital d'Auch, Division of Gynaecology</p> <p>Hannigsberg, Jacob; Brest university hospital, division of gynecology</p> <p>Plu-bureau, Geneviève; APHP, hôpital Cochin, Division of Gynaecology</p> <p>Cogulet, Virginie; Brest university hospital, Pharmacy</p> <p>Merviel, Philippe; Brest university hospital, Division of Gynaecology</p> <p>Mottier, Dominique; Brest university Hospital</p> |
| Keywords:                     | Subfertility < GYNAECOLOGY, INTERNAL MEDICINE, Clinical trials < THERAPEUTICS                                                                                                                                                                                                                                                                                                                                                                                                                                                                                                                                                                                                                                                                                                                                                                                                                              |
|                               |                                                                                                                                                                                                                                                                                                                                                                                                                                                                                                                                                                                                                                                                                                                                                                                                                                                                                                            |

SCHOLARONE™  
Manuscripts

# Hydroxychloroquine for Prevention of Recurrent Miscarriage:

## Study Protocol for a Multicenter Randomized Placebo Controlled Trial

Elisabeth Pasquier,<sup>1</sup> Luc de Saint Martin,<sup>1</sup> Gisèle Marhic,<sup>2</sup> Céline Chauleur,<sup>3</sup> Caroline Bohec,<sup>4</sup> Florence Bretelle,<sup>5</sup> Véronique Lejeune-Saada,<sup>6</sup> Jacob Hannigsberg,<sup>7</sup> Geneviève Plu-Bureau,<sup>8</sup> Virginie Cogulet,<sup>9</sup> Philippe Merviel,<sup>7</sup> Dominique Mottier,<sup>10</sup>

### Author affiliations :

<sup>1</sup>EA 3878 Groupe d'Etude de la Thrombose de Bretagne Occidentale, Department of Internal Medicine and Chest Diseases, Brest University Hospital, Hôpital LaCavale Blanche, Brest, France

<sup>2</sup>Centre d'Investigation Clinique-INSERM 1412, Hôpital La Cavale Blanche, Brest, France

<sup>3</sup>Division of Gynaecology, Saint Etienne University Hospital, Saint Etienne, France

<sup>4</sup>Division of Gynaecology, Hôpital François Mitterand, Pau, France

<sup>5</sup>Division of Gynaecology, Université de la Méditerranée, Hôpital Nord, Marseille, France

<sup>6</sup>Division of Gynaecology, Hôpital d'Auch, Auch, France

<sup>7</sup>Division of Gynaecology, Brest University Hospital, Hôpital Morvan, Brest, France

<sup>8</sup>Division of Gynaecology, APHP, hôpital Cochin, Paris, France

<sup>9</sup>Central pharmacy, Brest University Hospital, Brest, France

<sup>10</sup>EA 3878 Groupe d'Etude de la Thrombose de Bretagne Occidentale, La Cavale Blanche Hospital, Brest, France

**Corresponding author** E-mail: Elisabeth.pasquier@chu-brest.fr

## ABSTRACT

**Introduction** Recurrent miscarriage (RM), defined by  $\geq 3$  consecutive losses during the first trimester of pregnancy, affects 1 to 2% of fertile couples. Standard investigations fail to reveal any apparent cause in ~ 50% of couples. However, on the basis of animal models and clinical studies, several hypotheses have been put forward concerning underlying mechanisms of RM: altered ovarian reserve, progesterone defect, thrombotic and/or endothelial dysfunction, immunological disturbances. Nonetheless, no study has yet reached conclusive beneficial clinical evidence for a potential treatment in unexplained RM. Hydroxychloroquine (HCQ) is a molecule with extensive safety data during pregnancy. HCQ pharmacological properties (e.g. anti-thrombotic, vascular protective, immunomodulatory, improved glucose tolerance, lipidlowering, antiinfectious) could be effective against some mechanisms of unexplained RM. Furthermore, eventhough clinical benefit of HCQ is suggested in prevention of thrombotic and late obstetric events in antiphospholipid (APL) syndrome, there is no data suggesting the benefit of HCQ in RM in the presence of APL antibodies.

**Methods and analysis** Taken all together and given the low cost of HCQ, the aim of this multicenter, randomized placebo-controlled, double-blind study is to investigate whether HCQ would improve the live-birth rate in women with RM, irrespective of maternal thrombophilic status: i) no known thrombophilia, ii) inherited thrombophilia or iii) APL antibodies. The primary end-point is a live and viable birth. After confirming eligibility and obtaining consent, 300 non-pregnant women will be randomized in 2 parallel groups for a daily oral treatment (HCQ 400 mg or placebo), initiated before conception and stopped at 10 weeks' gestation. If pregnancy doesn't occur after one year, the treatment will be stopped.

1  
2  
3 **Ethics and dissemination** Agreement from the French National Public Health and Drug  
4  
5 Security Agency (160765A-22) and ethical approval from the Committee for the Protection of  
6  
7 Persons of NORD-OUEST I (2016-001330-97) have been obtained.  
8  
9

10 **Trial registration number** ClinicalTrials.gov: NCT0316513  
11  
12  
13  
14  
15  
16  
17  
18  
19  
20  
21  
22  
23  
24  
25  
26  
27  
28  
29  
30  
31  
32  
33  
34  
35  
36  
37  
38  
39  
40  
41  
42  
43  
44  
45  
46  
47  
48  
49  
50  
51  
52  
53  
54  
55  
56  
57  
58  
59  
60

## STRENGTHS AND LIMITATIONS OF THIS STUDY

- Despite numerous fundamental research publications and clinical trials, the only recommendation that applies to follow-up of child bearing women suffering from RM relies on cocooning.
- This is the first randomized placebo-controlled study which aims to investigate whether oral hydroxychloroquine would improve the live-birth rate in women with recurrent miscarriage irrespective of maternal thrombophilic status.
- As a possible limitation, this study is based on the hypothesis that recurrent miscarriage often results from combined failures which could benefit from the pleiotropic effects of hydroxychloroquine.
- As hydroxychloroquine should probably be administered at least 2 menstrual cycles before conception to have an effect, women will be advised not to get pregnant during this period, but we do not plan to exclude those who will conceive too early.

## INTRODUCTION

### Background

RM is a common public health reproductive burden causing both physical and emotional distress. To date there is no treatment whose benefit has been clearly proved, even in the presence of well-known risk factors of RM. Most importantly, the absence of benefit has been clearly demonstrated for some treatments that are yet empirically proposed.

### *Unexplained Recurrent Miscarriage (RM)*

A sporadic miscarriage is clinically detected in approximately 10% to 15% of pregnancies. Fetal development usually stops before 10 weeks.<sup>1</sup> Given the recurrent miscarriage (RM) frequency among fertile couples (1% to 2%) being significantly higher than the expected random one (153 = 0.34 %), RM is most often defined as  $\geq 3$  consecutive losses. Apart from the detection of a lethal chromosomal abnormality on products of conception, the underlying mechanism of loss remains unknown in most cases. The rate of normal embryonic karyotypes in RM steadily increases from the third loss, suggesting alternative mechanisms than meiotic aberrations.<sup>2</sup> Standard investigations fail to reveal any apparent cause in ~50% of the women. However, On the basis of animal models and clinical studies, several hypotheses have been put forward. Here, we focus on thrombosis and both endothelial and immune dysfunctions. Those could be targeted by pharmacological properties of hydroxychloroquine (HCQ).

An association with some inherited thrombophilia has been reported (factor V Leiden, mutation G20210A of the prothrombin and protein S deficiency), although the odds ratio were most often  $\leq 2$ .<sup>3</sup> Animal models have demonstrated that some actors of the haemostatic system may participate in normal implantation and placental development regardless of the

1  
2  
3 coagulation process.<sup>4,5</sup> In humans, a basal prothrombotic state outside of pregnancy has been  
4  
5 measured in women with previous RM and without known thrombophilia.<sup>6-8</sup> This relative  
6  
7 prothrombotic state, measured at distance of any obstetrical event, could reflect chronic  
8  
9 endothelium damage in those women.<sup>9,10</sup> Notwithstanding, the clinical trials that have assessed  
10  
11 antithrombotic treatments (aspirin initiated before or after conception, eventually combined  
12  
13 with LMWH, or LMWH alone initiated after pregnancy diagnosis) did not show any benefit  
14  
15 in prevention of further loss.<sup>11-14</sup> Likewise, no benefit of LMWH has been shown in the  
16  
17 subgroup of women with inherited thrombophilia (TIPPS study).<sup>15</sup> However, we emphasize  
18  
19 that the subcutaneous route of LMWH administration does not allow assessing this treatment  
20  
21 at the critical time of implantation onset in fertile women. Indeed, the injections cannot be  
22  
23 routinely initiated before 5 weeks' gestation.  
24  
25

26  
27 Regarding immune dysfunction, apart from the detection of many auto-antibodies  
28  
29 (antiphospholipid, anti-thyroid),<sup>16</sup> attention is now focused on natural killer cells, whose  
30  
31 temporal and spatial distribution in the uterine mucosa suggests that they contribute to control  
32  
33 trophoblast invasion and cytokine response at the maternal-fetal interface (balances Th-1 / Th-  
34  
35 2 and Th-17 / T-reg). Th-2 and T-reg preponderance in normal pregnancy shifts to Th-1 and  
36  
37 Th-17 predominance in RM.<sup>17,18</sup> Otherwise, an overexpression of TOLL receptors in decidua  
38  
39 was observed in women with RM, especially TLR4 and TLR9 receptors.<sup>19</sup>  
40  
41 Immunomodulatory treatments have therefore been proposed and assessed without conclusive  
42  
43 results (paternal leukocyte immunization,<sup>20</sup> intravenous immunoglobulins,<sup>21</sup> Small doses of  
44  
45 corticosteroids.)<sup>22</sup>  
46  
47

48  
49 Despite numerous fundamental research publications and clinical trials, the only current  
50  
51 recommendation for follow-up of child bearing women suffering from unexplained RM relies  
52  
53 on cocooning.<sup>17,23</sup>  
54  
55  
56  
57  
58  
59  
60



### ***RM in the presence of antiphospholipid (APL) antibodies***

Antiphospholipid syndrome (APS) is diagnosed in the presence of persistent, above the 99th percentile, APL levels and of at least one clinical manifestation (obstetrical, arterial or venous thrombosis). «Three or more unexplained consecutive spontaneous abortions before the 10th week of gestation, with maternal anatomic or hormonal abnormalities and paternal and maternal chromosomal causes excluded »<sup>24</sup> delineates one of the possible manifestation of APS. Even though RM is one accepted clinical manifestation of APS, its specificity is low, as compared to the occurrence of fetal death after 10 weeks of amenorrhea.<sup>24</sup> The benefit of low dose aspirin and/or LMWH or heparins for secondary prevention of RM has not been demonstrated in women who present with APL antibodies and no other clinical manifestation of APS.<sup>25</sup> The HEPASA study found no benefit of combination therapy of LMWH and low dose aspirin in women who presented with APL, without arterial or venous thrombosis history, and who had at least two fetal losses before 32 weeks of amenorrhea.<sup>25</sup> As a consequence, no clinical evidence has been drawn for an optimal management of these women.

### ***Rationale for hydroxychloroquine (HCQ)***

Chloroquine and HCQ are used for centuries to treat malaria. Because of a more favorable usage profile and immunomodulatory properties, HCQ use became common for treatment of autoimmune and inflammatory diseases. Other therapeutic properties of HCQ have since been discovered, or rather rediscovered, and assessed in a more consistent manner. The following HCQ properties could be effective against mechanisms of RM.

1  
2  
3 Since 30 years, benefit of HCQ to prevent venous thromboembolism (VTE) has been  
4 suspected<sup>26-35</sup> i) among patients with SLE<sup>26,31</sup> and ii) among all-comer patients, free of  
5 autoimmune disease, after orthopedic surgery.<sup>27-30</sup> Thus, before the use of LMWH, HCQ was  
6 assessed in the 1970s in the prevention of VTE events after orthopedic surgery. The results of  
7 randomized trials,<sup>28-30</sup> (around 10 000 patients included) led to the conclusion that HCQ was  
8 beneficial in preventing VTE after orthopedic surgery.<sup>28</sup> In patients with SLE, in the presence  
9 or absence of APL antibodies, studies have suggested the benefit of HCQ for the primary  
10 prevention of both arterial and venous thrombotic events.<sup>26,31-33</sup> In primary APS, HCQ  
11 reduced the thrombus size after vessel injury in mice<sup>34</sup> and would improve the secondary  
12 prevention of VTE in humans, in comparison to oral anticoagulants used alone.<sup>35</sup> The  
13 antithrombotic action of HCQ would be inherent to some biological effects (in the absence<sup>36-</sup>  
14 <sup>38</sup>or in the presence<sup>39-40</sup> of APL antibodies). Otherwise, much data support an endothelium  
15 protective action of HCQ via anti-diabetic,<sup>41</sup> lipidlowering,<sup>42</sup> anti-oxidant<sup>43</sup> effects or a direct  
16 endothelial protection, via ERK5 protein kinase activation.<sup>44</sup>

17  
18 Regarding immunomodulation, HCQ has an impact on the innate immunity by  
19 inhibition of the activation of some ToLL receptors (3,7,9).<sup>45-47</sup> HCQ decreases the circulating  
20 levels of interleukine 1, 2,<sup>48</sup> 6,<sup>49</sup> TNF<sup>49,50</sup> and, interferon- $\gamma$ ,<sup>51</sup> promoting the TH2 processes  
21 that prevail in a “normal pregnancy». Otherwise, HCQ decreases APL plasma levels<sup>52</sup> and  
22 interferes with both endothelial cell activation and TNF- $\alpha$  production, 2 major key pathways  
23 involved in APS.<sup>53-55</sup>

24  
25 We also outline the well-known anti-infectious action of HCQ which originates from  
26 the alkalization of intracellular acidic vesicles and might inhibit the growth of intracellular  
27 microorganisms. This could act against chronic endometritis, additional mechanism suspected  
28 in RM.

1  
2  
3 Remarkably, the use of HCQ (and closely related molecules) as anti-malarial or in auto-  
4 immune diseases during pregnancy<sup>56,58</sup> and lactation<sup>57</sup> have provided extensive safety data  
5 during pregnancy and even during breast-feeding.  
6  
7

8  
9  
10 Otherwise, oral administration of HCQ facilitates its prescription early, before conception,  
11 thus enabling fetal exposure from the very beginning of time period at risk for activation of  
12 RM underlying mechanisms. Noteworthy, HCQ has never been evaluated in the indication of  
13 RM with or without APL antibodies.  
14  
15  
16  
17

18  
19 Taken all together and given that RM is a stereotyped clinical entity whatever the maternal  
20 thrombophilic status, we aimed at evaluating the role of HCQ in prevention of RM, with or  
21 without APL antibodies or inherited thrombophilia.  
22  
23  
24  
25  
26  
27  
28  
29  
30  
31  
32  
33  
34  
35  
36  
37  
38  
39  
40  
41  
42  
43  
44  
45  
46  
47  
48  
49  
50  
51  
52  
53  
54  
55  
56  
57  
58  
59  
60

## STUDY OBJECTIVES

### *Primary objective*

The aim of this placebo-controlled, double-blind trial is to investigate whether HCQ (orally administered before conception until 10 weeks of gestational age) would improve the live-birth rate of 15% or more, in women with previous RM, irrespective of their biological thrombophilic status.

### *Secondary objectives*

We aim to investigate whether:

- HCQ effect would be different among women with inherited thrombophilia or APL antibodies
- HCQ would have an impact on the occurrence of some pregnancy events (early miscarriage, intrauterine fetal death, placental vascular disease)
- The impact of HCQ would be different in subgroups of women at higher or lower risk of recurrence according to the number of previous miscarriages (= 3 ou > 3), the maternal age ( $\geq 35$  ou < 35 ans), the parity: previous live-birth, a previous late fetal death after 10 weeks' gestation.

We aim to confirm that HCQ has no negative impact on the chance of getting pregnant, the newborn (gestational age, birth weight, survival at 28 days, congenital abnormalities), the child at 6 months.

## METHODS

### ***Study design***

This is a prospective, randomized 1:1 placebo-controlled, double-blind, and French multi-centre trial of phase III, with 2 parallel-groups (HCQ 400 mg or placebo). At randomization, the minimization method will be used to balance between the 2 groups and 2 main determinants of miscarriage recurrence: maternal age ( $\leq 35$  or  $>35$  years) and number of previous losses (3 or  $\geq 4$ ).

### ***Population***

The study population consists of women trying to conceive and who had experienced at least 3 consecutive miscarriages at the first trimester of pregnancy (normal parental karyotypes, no uterine cavity abnormality that might explain the losses). Those women are followed-up by their gynecologist or general practitioner who refers them to one of the RM specialized unit participating in the study for screening. At the inclusion visit, the medical investigator checks inclusion and exclusion criteria of eligible women.

### ***Inclusion criteria***

- Women aged between 18 and 37 inclusive,
- Women trying to conceive,
- Women with at least 3 previous consecutive miscarriages in the first pregnancy trimester, of unknown origin defined as:
  - Normal parental karyotypes,
  - No uterine cavity abnormality that might explain RM (ultrasound scan, hysteroscopy or hystero-graphy),

- In case of persistent positive APL antibodies according to the biological criteria of Myakis:<sup>24</sup> no previous thrombotic or obstetrical event defined in APS<sup>24</sup>, except for RM in the first trimester of pregnancy, .
- Women who have given their informed consent.

### *Exclusion criteria*

- Ongoing pregnancy,
- Normal pregnancy (live and viable birth) since the last miscarriage,
- Abnormal parental karyotype,
- Uterine cavity abnormality that might explain RM in the first trimester of pregnancy,
- Antiphospholipid Syndrome defined as both:
  - persistent positive APL antibodies: lupus anticoagulant and/or APL (anticardiolipin or anti  $\beta$ 2 GPI, IgG or IgM) titers > 99th percentile or >40 with at least 12 weeks interval between two positive determinations (persistent antibodies) AND,
  - a specific clinical setting of APS (thrombotic or obstetrical, apart from RM in the first trimester of pregnancy) according to Myakis criteria.<sup>24</sup>
- Known contraindication to a treatment by HCQ (retinopathy, hypersensitivity to chloroquine or HCQ, G6PD deficiency, acute intermittent porphyria, chronic liver or kidney insufficiency, extensive cutaneous psoriasis not controlled by local treatment, significant chronic digestive or hematologic disease) or known rare disorder of lactose metabolism (excipient),
- Past history of epilepsy or psychotic disorders,
- Indication to a treatment by HCQ according to the MA (rheumatoid arthritis, Lupus, solar eczema),

- Previous exposure >4 years to chloroquine or HCQ,
- Previous inclusion in this study,
- Woman unable to consent, protected under the terms of the law, or woman deprived of liberty by judicial or administrative decision,
- non affiliation to the social security system,
- Impossible follow-up.

### ***Allocation, randomization and blinding***

After inclusion and obtaining written consent, an identification number is assigned to the patient through a secure server providing access to electronic case report forms generated by the CIC Brest (via the "Capture System" software). The randomization is done using the "Capture System" software with implementation of a randomization with minimization to balance between the 2 treatment groups according to the main determinants of miscarriage recurrence: age ( $\leq 35$  or  $>35$  years) and number of miscarriages (3 or  $\geq 4$ ).

The patient, the investigator and all medical and paramedic professionals taking care of the patient will be blinded to the treatment group. The packaging of placebo and HCQ will be provided in the form of capsules with identical external shape and packaging. Information on the correspondence between treatment group and the patient number will be held by both the central pharmacy of Brest CHRU and the Data Management Unit.

### ***Intervention***

Included patients are assigned to receive either 400 mg of oral HCQ per day, administered in 2 divided doses of 200 mg or 2 daily doses of oral placebo. Thus, treatment is initiated before

1  
2  
3 conception and stopped at 10 weeks' gestation (weeks of amenorrhea) or after one year of  
4  
5 treatment in the absence of pregnancy.  
6  
7  
8  
9

### 10 ***Rationale for choosing oral 400 mg daily HCQ***

11  
12  
13 It is the usual route of administration and dose for indications specified by the Marketing  
14 authorization (MA). This choice of dose comes from the evaluation of the risk-benefit balance  
15 in the MA indications and, over all, from the fact that data of good tolerance have been  
16 compiled to this (usual) dosage in literature. Otherwise, in most cases, fetal development  
17 stops before 10 weeks of amenorrhea. Treatment exposure is essential from the very  
18 beginning of implantation, a developmental stage that can potentially be disturbed by the  
19 mechanisms responsible for miscarriage. The oral administration allows starting the treatment  
20 before conception. This drug has a long half-life (from 30 to 60 days). Its full effect is  
21 obtained only after certain duration of exposure. That is why its administration is required  
22 before conception and its discontinuation after 10 weeks of amenorrhea, i.e. before the end of  
23 the first trimester of pregnancy which is at the highest risk for RM.  
24  
25  
26  
27  
28  
29  
30  
31  
32  
33  
34  
35  
36  
37  
38  
39  
40

### 41 ***Treatments frequently given in combination***

- 42  
43  
44 ➤ Folic acid and other vitamin supplements,
- 45  
46  
47  
48  
49  
50  
51  
52  
53  
54  
55  
56  
57  
58  
59  
60  
61  
62  
63  
64  
65  
66  
67  
68  
69  
70  
71  
72  
73  
74  
75  
76  
77  
78  
79  
80  
81  
82  
83  
84  
85  
86  
87  
88  
89  
90  
91  
92  
93  
94  
95  
96  
97  
98  
99  
100  
101  
102  
103  
104  
105  
106  
107  
108  
109  
110  
111  
112  
113  
114  
115  
116  
117  
118  
119  
120  
121  
122  
123  
124  
125  
126  
127  
128  
129  
130  
131  
132  
133  
134  
135  
136  
137  
138  
139  
140  
141  
142  
143  
144  
145  
146  
147  
148  
149  
150  
151  
152  
153  
154  
155  
156  
157  
158  
159  
160  
161  
162  
163  
164  
165  
166  
167  
168  
169  
170  
171  
172  
173  
174  
175  
176  
177  
178  
179  
180  
181  
182  
183  
184  
185  
186  
187  
188  
189  
190  
191  
192  
193  
194  
195  
196  
197  
198  
199  
200  
201  
202  
203  
204  
205  
206  
207  
208  
209  
210  
211  
212  
213  
214  
215  
216  
217  
218  
219  
220  
221  
222  
223  
224  
225  
226  
227  
228  
229  
230  
231  
232  
233  
234  
235  
236  
237  
238  
239  
240  
241  
242  
243  
244  
245  
246  
247  
248  
249  
250  
251  
252  
253  
254  
255  
256  
257  
258  
259  
260  
261  
262  
263  
264  
265  
266  
267  
268  
269  
270  
271  
272  
273  
274  
275  
276  
277  
278  
279  
280  
281  
282  
283  
284  
285  
286  
287  
288  
289  
290  
291  
292  
293  
294  
295  
296  
297  
298  
299  
300  
301  
302  
303  
304  
305  
306  
307  
308  
309  
310  
311  
312  
313  
314  
315  
316  
317  
318  
319  
320  
321  
322  
323  
324  
325  
326  
327  
328  
329  
330  
331  
332  
333  
334  
335  
336  
337  
338  
339  
340  
341  
342  
343  
344  
345  
346  
347  
348  
349  
350  
351  
352  
353  
354  
355  
356  
357  
358  
359  
360  
361  
362  
363  
364  
365  
366  
367  
368  
369  
370  
371  
372  
373  
374  
375  
376  
377  
378  
379  
380  
381  
382  
383  
384  
385  
386  
387  
388  
389  
390  
391  
392  
393  
394  
395  
396  
397  
398  
399  
400  
401  
402  
403  
404  
405  
406  
407  
408  
409  
410  
411  
412  
413  
414  
415  
416  
417  
418  
419  
420  
421  
422  
423  
424  
425  
426  
427  
428  
429  
430  
431  
432  
433  
434  
435  
436  
437  
438  
439  
440  
441  
442  
443  
444  
445  
446  
447  
448  
449  
450  
451  
452  
453  
454  
455  
456  
457  
458  
459  
460  
461  
462  
463  
464  
465  
466  
467  
468  
469  
470  
471  
472  
473  
474  
475  
476  
477  
478  
479  
480  
481  
482  
483  
484  
485  
486  
487  
488  
489  
490  
491  
492  
493  
494  
495  
496  
497  
498  
499  
500  
501  
502  
503  
504  
505  
506  
507  
508  
509  
510  
511  
512  
513  
514  
515  
516  
517  
518  
519  
520  
521  
522  
523  
524  
525  
526  
527  
528  
529  
530  
531  
532  
533  
534  
535  
536  
537  
538  
539  
540  
541  
542  
543  
544  
545  
546  
547  
548  
549  
550  
551  
552  
553  
554  
555  
556  
557  
558  
559  
560  
561  
562  
563  
564  
565  
566  
567  
568  
569  
570  
571  
572  
573  
574  
575  
576  
577  
578  
579  
580  
581  
582  
583  
584  
585  
586  
587  
588  
589  
590  
591  
592  
593  
594  
595  
596  
597  
598  
599  
600  
601  
602  
603  
604  
605  
606  
607  
608  
609  
610  
611  
612  
613  
614  
615  
616  
617  
618  
619  
620  
621  
622  
623  
624  
625  
626  
627  
628  
629  
630  
631  
632  
633  
634  
635  
636  
637  
638  
639  
640  
641  
642  
643  
644  
645  
646  
647  
648  
649  
650  
651  
652  
653  
654  
655  
656  
657  
658  
659  
660  
661  
662  
663  
664  
665  
666  
667  
668  
669  
670  
671  
672  
673  
674  
675  
676  
677  
678  
679  
680  
681  
682  
683  
684  
685  
686  
687  
688  
689  
690  
691  
692  
693  
694  
695  
696  
697  
698  
699  
700  
701  
702  
703  
704  
705  
706  
707  
708  
709  
710  
711  
712  
713  
714  
715  
716  
717  
718  
719  
720  
721  
722  
723  
724  
725  
726  
727  
728  
729  
730  
731  
732  
733  
734  
735  
736  
737  
738  
739  
740  
741  
742  
743  
744  
745  
746  
747  
748  
749  
750  
751  
752  
753  
754  
755  
756  
757  
758  
759  
760  
761  
762  
763  
764  
765  
766  
767  
768  
769  
770  
771  
772  
773  
774  
775  
776  
777  
778  
779  
780  
781  
782  
783  
784  
785  
786  
787  
788  
789  
790  
791  
792  
793  
794  
795  
796  
797  
798  
799  
800  
801  
802  
803  
804  
805  
806  
807  
808  
809  
810  
811  
812  
813  
814  
815  
816  
817  
818  
819  
820  
821  
822  
823  
824  
825  
826  
827  
828  
829  
830  
831  
832  
833  
834  
835  
836  
837  
838  
839  
840  
841  
842  
843  
844  
845  
846  
847  
848  
849  
850  
851  
852  
853  
854  
855  
856  
857  
858  
859  
860  
861  
862  
863  
864  
865  
866  
867  
868  
869  
870  
871  
872  
873  
874  
875  
876  
877  
878  
879  
880  
881  
882  
883  
884  
885  
886  
887  
888  
889  
890  
891  
892  
893  
894  
895  
896  
897  
898  
899  
900  
901  
902  
903  
904  
905  
906  
907  
908  
909  
910  
911  
912  
913  
914  
915  
916  
917  
918  
919  
920  
921  
922  
923  
924  
925  
926  
927  
928  
929  
930  
931  
932  
933  
934  
935  
936  
937  
938  
939  
940  
941  
942  
943  
944  
945  
946  
947  
948  
949  
950  
951  
952  
953  
954  
955  
956  
957  
958  
959  
960  
961  
962  
963  
964  
965  
966  
967  
968  
969  
970  
971  
972  
973  
974  
975  
976  
977  
978  
979  
980  
981  
982  
983  
984  
985  
986  
987  
988  
989  
990  
991  
992  
993  
994  
995  
996  
997  
998  
999  
1000



### ***Study plan and procedures***

Before pregnancy, women are monthly contacted by phone. The non pregnant women are systematically seen in consultation after 6 and 12 months of treatment. In the absence of pregnancy after one year, the treatment will be withdrawn and patients will be contacted by phone at 14 months and 18 months (End-of-Study visit).

During pregnancy, women are monthly seen in consultation (4 first months) or contacted by phone. The treatment is withdrawn at 10 weeks' gestation or earlier in case of pregnancy loss.

After delivery, the women are seen in consultation at ~2 months, and contacted by phone at 6 months (End-of-Study visit).

Four tubes of 2.7 ml with sodium citrate and 4 tubes SST of 5 ml (for plasma and serum bank, respectively) are collected at both the inclusion visit and the visit of pregnancy onset or the visit planned after one year of treatment in the absence of pregnancy. Additionally 2 tubes EDTA of 5 ml are collected for DNA bank at inclusion. The biological collection of plasma is carried out within 3 hours after receipt of tubes. DNA extraction is carried out within one week of collection (and at the latest within a month if the sample is frozen at  $-80^{\circ}\text{C}$  pending extraction). Those specimens are designed to identify prognostic factors (including thrombophilic work-up) for efficacy of the study treatment.

### ***End points***

The primary end point is a live and viable birth.

The secondary end points are:

- A live and viable birth, for the subgroup analyses,

- The occurrence of miscarriage, in-utero fetal death, placental vascular disease, premature delivery,
- Gestational age at miscarriage,
- Concerning the child: gestational age and weight at birth, survival at 28 days, safety data at 6 months of life, congenital abnormality.

### ***Safety considerations, safety monitoring and AE reporting***

Apart from, adverse events (AE) and serious adverse events (SAE), some safety parameters will be systematically recovered: CBC, visual and neurological symptoms for women and reports of ultrasound and post-natal medical visits for children. Adverse events (AE) are defined as any untoward medical occurrence in a person who consents to biomedical research whether this event is related or not to the research or experimental drug on which this research addresses. The gravity of serious adverse events (SAE) is defined by one of the following findings: death, life-threatening situation, significant or sustained incapacity or disability, hospitalization, prolongation of hospitalization, deformity or birth defect, potentially serious event. Any SAE or event of interest, regardless of its causal relationship with the trial treatment or the research, must be reported to the sponsor, as soon as possible and the latest 24 hrs after their occurrence for SAE. The investigator is in charge of noting and reporting all SAE occurring during the study, from the date of the signed informed consent, during the study's expected duration of follow up (6 months after the treatment cessation for women and at age 6 months for newborns). Furthermore, regardless of the event occurrence deadline after the end of the study, all SAE that may be due to the research must be declared to the sponsor when there is no other cause and effect accounted for (such as serious events that may occur long after exposure to the drug, such as cancers or congenital abnormalities).

1  
2  
3 Some AE and SAE are expected and can be linked to i) pregnancy, ii) the disease (occurrence  
4 of another miscarriage) or study treatment (benign, adverse reaction AR, as digestive  
5 symptoms or severe, serious adverse reaction SAR as skin reaction, which requires to  
6 immediately stop the treatment).  
7  
8  
9  
10

### 11 12 13 14 15 ***Independent Data and safety monitoring Board (IDSMB)*** 16

17  
18 The IDSMB comprises 8 members without competing interests, not directly involved in other  
19 aspects of the trial and independent from the sponsor: 7 voting members, experts in  
20 complementary fields of the pathology and clinical trials (internal medicine, methodology,  
21 specialist of teratogenic agents, neonatology, hematology, ophthalmology) and a non-voting  
22 independent statistician. IDSMB monitors the data that affects patient safety, provides  
23 independent expertise for the evaluation of adverse events (AE) occurring during the study,  
24 expresses an opinion concerning the benefit / risk ratio and provides recommendations in  
25 order to help the steering committee to take decisions on protocol modification or early  
26 termination of the study. The members of the IDSMB will have to meet every 20 inclusions.  
27 The IDSMB will transmit its recommendations to the steering Committee, which decides  
28 whether or not to stop the study. Given the safety data and the treatment benefit, several  
29 different recommendations can be provided by the IDSMB: i) continuation of study without  
30 protocol modification, ii) continuation of study with modification of protocol, iii) temporarily  
31 discontinuation of inclusions, iiiii) early termination of the study  
32  
33  
34  
35  
36  
37  
38  
39  
40  
41  
42  
43  
44  
45  
46  
47  
48

49 Over the course of study, the IDSMB will have an advisory role in reassessing the benefit/risk  
50 ratio of the study.  
51  
52  
53  
54  
55  
56  
57  
58  
59  
60

### *Number of patients*

The total number of scheduled patients to be recruited is 300, on the basis of the following hypotheses:

- 80% of the included women should get pregnant (ALIFE study).<sup>11</sup>
- Among women who will get pregnant, we suppose that the rate of achieved pregnancy will be of 70% in the placebo group (PREFIX study).<sup>14</sup>

To demonstrate a minimal clinically important difference of 15% in live-birth rates on HCQ (i.e. a 50% relative risk reduction in pregnancy loss), we need to enroll 300 women for a power of 80%, and a two-tailed alpha risk of 5%.

The anticipated duration of recruitment is 3 years and the duration of participation of each patient: from 7 to 29 months.

### *Analyses plan*

Analyses will be firstly conducted on an intention to treat basis for all women who have started pregnancy. Hierarchical analysis including three steps is planned :comparison of the number of live and viable births, between the two treatment groups i) among all the women, ii) among women without known APL antibodies, iii) among women without known thrombophilia (APL or inherited thrombophilia). We plan to adjust for age and number of previous losses if the difference between the two treatment groups is statistically significant ( $p < .05$ ).

Secondary analyses will be conducted on an intention to treat mode:

1  
2  
3 For all included women, comparison of the number of live and viable births between the two  
4  
5 treatment groups.  
6

7  
8 Among women who will get pregnant:  
9

- 10 ➤ Measure of treatment effect in women at higher risk of further miscarriage,  
11 according to the presence of thrombophilia, past history of intrauterine fetal  
12 death after 10 week's gestation, past history of miscarriage, > 3 previous  
13 miscarriage or, no previous newborn baby,  
14
- 15 ➤ Comparison between the two treatment groups of the occurrence of several  
16 obstetrical events (miscarriage and intrauterine fetal death, vasculo placental  
17 disease, premature birth),  
18
- 19 ➤ Comparison between the two treatment groups of newborn clinical data  
20 (gestation time at delivery, birth weight adjusted to the gestation time, number  
21 of newborn babies living at 28 days and congenital abnormalities).  
22  
23  
24  
25  
26  
27  
28  
29  
30  
31  
32

33 A "per-protocol analysis" (primary endpoint) will include only patients properly exposed to  
34 the study treatment, that is i) at least during a whole menstrual cycle before pregnancy onset  
35 and until 10 weeks of amenorrhea ii) compliance  $\geq$  80%.  
36  
37  
38  
39

40 No unblinded interim analysis is planned.  
41  
42

43 The biological collection will be carried out by the CRB of the CHRU of BREST and  
44 integrated into the collection "thrombosis" declared to the Ministry (2008-214/ DC-2009-  
45 925).  
46  
47  
48  
49  
50  
51  
52

## 53 **DISCUSSION**

54  
55  
56  
57  
58  
59  
60

1  
2  
3 To date, there has not yet been an optimal therapy with conclusive clinical benefit for  
4 unexplained RM, in the absence or presence of inherited thrombophilia. Providing some  
5 psychological support seems to be the only available therapy for women with unexplained  
6 RM. Although the probability of a further normal pregnancy seems high, (~70% at age 32  
7 after 3 consecutive miscarriages),<sup>59</sup> the proposed therapeutic interventions are sometimes  
8 excessive, (e.g. possible side effects) and costly (e.g. intravenous immunoglobulins, assisted  
9 procreation). Therefore, it is of utmost importance to investigate other therapeutic options.  
10  
11  
12  
13  
14  
15  
16  
17

18 In RM women with high titers of APL antibodies but without any other previous clinical  
19 event listed in APS (thrombotic or obstetric event), benefit of antithrombotic treatment  
20 (aspirin or LMWH) remains controversial. Clinical benefit of HCQ has not been demonstrated  
21 in prospective studies with robust methodology.<sup>60</sup>  
22  
23  
24  
25  
26  
27

28 In conclusion, the benefit/risk ratio and low cost are strong incentives for assessment of HCQ  
29 in unexplained RM irrespective of maternal thrombophilic status.  
30  
31  
32  
33  
34  
35

## 36 **SPONSORSHIP**

37  
38  
39 This study was sponsored by Brest University Hospital.  
40  
41  
42  
43  
44  
45

## 46 **PATIENT AND PUBLIC INVOLVEMENT**

47  
48  
49 Patients were not involved in the design of the study.  
50  
51  
52  
53  
54

## 55 **ETHICS, REGULATORY APPROVALS AND DISSEMINATION**

1  
2  
3 Agreement from the French National Public Health and Drug Security Agency (160765A-22)  
4 and ethical approval from the Committee for the Protection of Persons of NORD-OUEST I ()  
5 have been obtained on November 4<sup>th</sup> 2016 and March 2<sup>nd</sup> 2017, respectively.  
6  
7  
8  
9

10 This trial is registered at [www.ClinicalTrials.gov](http://www.ClinicalTrials.gov) as # NCT0316513. and the French National  
11 Health and Drug Safety Agency (EudraCT # 2016-001330-97).  
12  
13

14 The necessary trial insurance is provided by HDI Gerling Industrie Versicherung (PARIS).  
15  
16  
17  
18  
19  
20

## 21 **Acknowledgements**

22  
23 The authors thank the clinical network Gynobs29 of the gynecologists and obstetricians of  
24 West Brittany and the national research network GOCIC “Réseau Gynécologie Obstétricale  
25 des Centres d’Investigation Clinique”. They also thank Zarrin Alavi (Inserm, CIC 1412) for  
26 proofreading and all the other investigators of the study: Dr Tiphaine Raia-Barjat  
27 (Gynecology, Saint-Etienne), Dr Nathalie Lesavre (Centre d’Investigation Clinique, Hôpital  
28 Nord, Marseille), Arsène Mékinian (APHP, hospital Saint-Antoine, Paris), Norbert Winer  
29 (Gynecology, Nantes), Charles Bellot and Gaelle Le Foll (Gynecology, Quimper), Céline  
30 Pimentel (gynecology, Rennes), Aude Bourtembourg (Gynecology, Besançon) Véronique  
31 Debarge ( Gynecology, Lille), Dominique Luton (APHP, Bichat).  
32  
33  
34  
35  
36  
37  
38  
39  
40  
41  
42  
43

## 44 **Contributors**

45  
46 EP conceived and designed the study. EP drafted the original grant proposal and trial  
47 protocol. LDSM provides methodological and statistical expertise. GM has assisted in  
48 developing the protocol, helped with implementation and has responsibilities for day-to-day  
49 running of the trial including participant recruitment, data collection and liaising with other  
50 sites. JH and PM have helped with protocol implementation. CB, CC, FB, VLS, GPB, DM  
51  
52  
53  
54  
55  
56  
57  
58  
59  
60

1  
2  
3 have participated in the design of the study. VC coordinates treatment production and  
4 dispensation. All authors critically reviewed and approved the final version of the manuscript.  
5  
6  
7  
8  
9

10 **Funding** The study was supported by a grant from the French Ministry of Health (PHRCN-  
11 17-0573).  
12  
13  
14

15  
16  
17  
18 **Competing interests** None declared.  
19  
20  
21  
22  
23

24 **Patient consent** Obtained.  
25  
26  
27  
28  
29  
30  
31  
32  
33  
34  
35  
36  
37  
38  
39  
40  
41  
42  
43  
44  
45  
46  
47  
48  
49  
50  
51  
52  
53  
54  
55  
56  
57  
58  
59  
60



## References

1. Branch DW, Gibson M, Silver RM. Clinical practice. Recurrent miscarriage. *N Engl J Med*. 2010;363(18):1740-1747.
2. Ogasawara M, Aoki K, Okada S, Suzumori K. Embryonic karyotype of abortuses in relation to the number of previous miscarriages. *Fertil Steril* 2000; 73: 300–4.
3. Rey E, Kahn SR, David M, Shrier I. Thrombophilic disorders and fetal loss: a meta-analysis. *Lancet*. 2003;361(9361):901-908.
4. Isermann B, Sood R, Pawlinski R, Zogg M, Kalloway S, Degen JL, et al. The thrombomodulin-protein C system is essential for the maintenance of pregnancy, *Nat. Med.* 9 (3) (2003) 331–337.
5. Li W, Zheng X, Gu JM, Ferrel GLL, Brady M, Esmon NL, et al, Extraembryonic expression of EPCR is essential for embryonic viability, *Blood* 106 (8) (2005) 2716–2722.
6. Laude I, Rongières-Bertrand C, Boyer-Neumann C, et al. Circulating procoagulant microparticles in women with unexplained pregnancy loss: a new insight. *Thromb Haemost.* 2001;85(1):18-21.
7. Rai R, Tuddenham E, Backos M, et al. Thromboelastography, whole-blood haemostasis and recurrent miscarriage. *Hum Reprod*. 2003;18(12):2540-2543.
8. de Saint Martin L, Duchemin J, Bohec C, et al. Increased thrombin generation measured in the presence of thrombomodulin in women with early pregnancy loss. *Fertil Steril*. 2011;95(5):1813-1815, e1.

- 1  
2  
3 9. Pasquier E, De Saint Martin L, Bohec C, Collet M, Dignat George F, Mottier D.  
4 Unexplained pregnancy loss: a marker of basal endothelial dysfunction? *Fertil Steril*. 2013  
5 Oct;100(4):1013-7.  
6  
7  
8  
9  
10 10. Kharazmi E, Dossus L, Rohrmann S, Kaaks R. Pregnancy loss and risk of cardiovascular  
11 disease: a prospective population-based cohort study (EPIC-Heidelberg). *Heart*. 2011;  
12 97(1):49-54.  
13  
14  
15  
16  
17 11. Kaandorp SP, Goddijn M, van der Post JA, et al. Aspirin plus heparin or aspirin alone in  
18 women with recurrent miscarriage. *N Engl J Med*. 2010; 362(17):1586-1596.  
19  
20  
21  
22 12. Clark P, Walker ID, Langhorne P, et al. SPIN (Scottish Pregnancy Intervention) study: a  
23 multicenter, randomized controlled trial of low-molecular-weight heparin and low-dose  
24 aspirin in women with recurrent miscarriage. *Blood*. 2010;115(21):4162-7.  
25  
26  
27  
28  
29  
30  
31 13. Visser J, Ulander VM, Helmerhorst FM, et al. Thromboprophylaxis for recurrent  
32 miscarriage in women with or without thrombophilia. HABENOX: a randomised multicentre  
33 trial. *Thromb Haemost*. 2011;105(2):295-301.  
34  
35  
36  
37  
38 14. Pasquier E, de Saint Martin L, Bohec C, Chauleur C, Bretelle F, Marhic G, et al.  
39 Enoxaparin for prevention of unexplained recurrent miscarriage: a multicenter randomized  
40 double-blind placebo-controlled trial. *Blood*. 2015;125: 2200-5.  
41  
42  
43  
44  
45 15. Rodger MA, Hague WM, Kingdom J, et al; TIPPS Investigators. Antepartum dalteparin  
46 versus no antepartum dalteparin for the prevention of pregnancy complications in pregnant  
47 women with thrombophilia (TIPPS): a multinational open-label randomised trial. *Lancet*.  
48 2014;384(9955): 1673-1683.  
49  
50  
51  
52  
53  
54  
55  
56  
57  
58  
59  
60

- 1  
2  
3 16. van den Boogaard E, Vissenberg R, Land JA, van Wely M, van der Post JA, Goddijn M,  
4 Bisschop PH. Significance of (sub)clinical thyroid dysfunction and thyroid autoimmunity  
5 before conception and in early pregnancy: a systematic review, *Hum. Reprod* 2011; 17(5):  
6  
7 605–619  
8  
9
- 10  
11  
12 17. Rai R, Regan L. Recurrent miscarriage. *Lancet*. 2006;368(9535):601-611.  
13
- 14  
15 18. Figueiredo AS and Schumacher A. The T helper type 17/regulatory T cell paradigm in  
16 pregnancy. *Immunology*. 2016; 148:13–21.  
17
- 18  
19 19. Kang X, Zhang X, Liu Z, Xu H, Wang T, He L, Zhao A. Excessive TLR9 signaling  
20 contributes to the pathogenesis of spontaneous abortion through impairment of Treg cell  
21 survival by activation of Caspase 8/3. *Int Immunopharmacol*. 2015;29(2):285-92.  
22  
23  
24  
25
- 26  
27 20. Porter TF, LaCoursiere Y, Scott JR. Immunotherapy for recurrent miscarriage. *Cochrane*  
28 *Database Syst Rev*. 2006;2:CD000112  
29
- 30  
31 21. Egerup P, Lindschou J, Gluud C, Christiansen OB; ImmuReM IPD Study Group. The  
32 Effects of Intravenous Immunoglobulins in Women with Recurrent Miscarriages: A  
33 Systematic Review of Randomised Trials with Meta-Analyses and Trial Sequential Analyses  
34 Including Individual Patient Data. *PLoS One*. 2015 Oct 30;10(10 ):e0141588  
35  
36  
37  
38
- 39  
40 22. Tang AW, Alfirevic Z, Turner MA, Drury JA, Small R, Quenby S. A feasibility trial of  
41 screening women with idiopathic recurrent miscarriage for high uterine natural killer cell  
42 density and randomizing to prednisolone or placebo when pregnant. *Hum Reprod*. 2013  
43 Jul;28(7):1743-52  
44  
45  
46  
47  
48  
49
- 50  
51 23. Liddell HS, Pattison NS, Zanderigo A. Recurrent miscarriage—outcome after supportive  
52 care in early pregnancy. *Aust N Z J Obstet Gynaecol* 1991; 31: 320–22.  
53  
54  
55  
56  
57  
58  
59  
60

- 1  
2  
3 24. Miyakis S, Lockshin MD, Atsumi T, et al. International consensus statement on an update  
4 of the classification criteria for definite antiphospholipid syndrome (APS). *JThromb Haemost.*  
5 2006;4(2):295-306.  
6  
7  
8  
9  
10 25. Laskin CA, Spitzer KA, Clark CA, Crowther MR, Ginsberg JS, Hawker GA, Kingdom  
11 JC, Barrett J, Gent M. Low molecular weight heparin and aspirin for recurrent pregnancy loss:  
12 results from the randomized, controlled HepASA Trial. *J Rheumatol.* 2009 Feb;36(2):279-87.  
13  
14  
15  
16  
17 26. Wallace DJ. Does hydroxychloroquine sulphate prevent clot formation in systemic lupus  
18 erythematosus? *ArthritisRheum*1987; 30(12):1435–6.  
19  
20  
21  
22 27. Johansson E, Forsberg K, Johnsson H. Clinical and experimental evaluation of the  
23 thromboprophylactic effect of hydroxychloroquine sulphate after total hip  
24 replacement. *Haemostasis*1981;10(2):89–96.  
25  
26  
27  
28  
29 28. Johnson R, Charnley J. Hydroxychloroquine in prophylaxis of pulmonary embolism  
30 following hip arthroplasty. *Clin Orthop Relat Res* 1979;144:174–7.  
31  
32  
33  
34 29. Carter AE, Eban R. Prevention of postoperative deep venous thrombosis in legs by orally  
35 administered hydroxychloroquine sulphate. *Br Med J* 1974; 3:94-95.  
36  
37  
38  
39 30. Wu TK. Prophylaxis of deep venous thrombosis by hydroxychloroquine sulfate and  
40 heparin. *Surg Gynecol Obstet* 1977;145:714–718.  
41  
42  
43  
44 31. Ruiz-Irastorza G, Egurbide MV, Pijoan JI, et al. Effect of antimalarials on thrombosis and  
45 survival in patients with systemic lupus erythematosus. *Lupus* 2006; 15:577–583.  
46  
47  
48  
49 32. Tektonidou MG, Laskari K, Panagiotakos DB, Moutsopoulos HM. Risk factors for  
50 thrombosis and primary thrombosis prevention in patients with systemic lupus erythematosus  
51 with or without antiphospholipid antibodies. *Arthritis Rheum* 2009; 61:29–36.  
52  
53  
54  
55  
56  
57  
58  
59  
60

- 1  
2  
3 33. Jung H, Bobba R, Su J, et al. The protective effect of antimalarial drugs on  
4 thrombovascular events in systemic lupus erythematosus. *Arthritis Rheum* 2010; 62:863–868.  
5  
6  
7  
8 34. Edwards MH, Pierangeli S, Liu X, et al. Hydroxychloroquine reverses thrombogenic  
9 properties of antiphospholipid antibodies in mice. *Circulation* 1997; 96:4380–4384.  
10  
11  
12  
13 35. Schmidt-Tanguy A., et al. Anti-thrombotic effects of hydroxychloroquine in primary  
14 antiphospholipid syndrome patients. *J Thromb Haemost.* 2013 Oct;11(10):1927-9  
15  
16  
17  
18 36. Madow BP. Use of anti-malarial drugs as “desludging” agents in vascular disease  
19 processes. *JAMA* 1960, 172:1630–1633.  
20  
21  
22  
23 37. Ernst E, Rose M, Lee R: Modification of trans-operative changes in blood fluidity by  
24 hydroxy-chloroquine. A possible explanation for the drugs anti-thrombotic effect.  
25  
26  
27  
28  
29  
30  
31 38. Carter AE, Eban R, Perrett RD. Prevention of post-operative deep venous thrombosis and  
32 pulmonary embolism. *Br Med J* 1971;1:312–314.  
33  
34  
35  
36 39. Espinola RG, PierangeliSS, GharaviAE, HarrisEN,GharaAE. Hydroxychloroquine  
37 reverses platelet activation induced by humanIgG antiphospholipid  
38 antibodies. *ThrombHaemost.*2002;87(3):518–22.  
39  
40  
41  
42  
43  
44 40. Rand JH,Wu XX, Quinn AS, Chen PP, Hathcock JJ, Taatjes D J.Hydroxychloroquine  
45 directly reduces the binding of antiphospholipid antibody-beta2-glycoprotein I complexes to  
46 phospholipid bilayers. *Blood* 2008;112(5):1687–95.  
47  
48  
49  
50  
51 41. Gerstein HC, Thorpe KE, Taylor DW, Haynes RB.The effectiveness of  
52 hydroxychloroquine in patients with type 2 diabetes mellitus who are refractory to  
53 sulfonylureas--a randomized trial. *Diabetes Res Clin Pract.* 2002 Mar;55(3):209-19.  
54  
55  
56  
57  
58  
59

- 1  
2  
3 42. Petri M, Lakatta C, Magder L, Goldman D. Effect of prednisone and hydroxychloroquine  
4 on coronary artery disease risk factors in systemic lupus erythematosus: a longitudinal data  
5 analysis. *Am J Med* 1994;96(3):254–9.  
6  
7  
8  
9  
10 43. Virdis A et al. Early treatment with hydroxychloroquine prevents the development of  
11 endothelial dysfunction in a murine model of systemic lupus erythematosus. *Arthritis Res*  
12 *Ther.* 2015 Oct 6;17:277.  
13  
14  
15  
16  
17 44. Le NT, Takei Y, Izawa-Ishizawa Y, Heo KS, Lee H, Smrcka AV, Miller BL, Ko KA,  
18 Ture S, Morrell C, Fujiwara K, Akaike M, Abe J. Identification of activators of ERK5  
19 transcriptional activity by high-throughput screening and the role of endothelial ERK5 in  
20 vasoprotective effects induced by statins and antimalarial agents. *J Immunol.* 2014 Oct  
21 1;193(7):3803-15.  
22  
23  
24  
25  
26  
27  
28  
29 45. Lafyatis R, York M, Marshak-Rothstein A: Antimalarial agents: closing the gate on Toll-  
30 like receptors? *Arthritis Rheum* 2006; 54:3068–3070.  
31  
32  
33  
34 46. Kyburz D, Brentano F, Gay S: Mode of action of hydroxychloroquine in RA—evidence of  
35 an inhibitory effect on Tolllike receptor signaling. *Nat Clin Pract Rheumatol* 2006; 2:458–  
36  
37  
38  
39 459.  
40  
41  
42 47. Kuznik A, Bencina M, Svajger U, Jeras M, Rozman B, Jerala R. Mechanism of  
43 endosomal TLR inhibition by antimalarial drugs and imidazoquinolines. *J Immunol.*  
44 2011;186(8):4794-804.  
45  
46  
47  
48  
49 48. Bygbjerg IC, Svenson M, Theander TG, Bendtzen K: Effect of antimalarial drugs on  
50 stimulation and interleukin 2 production of human lymphocytes. *Int J Immunopharmacol*  
51 1987; 9:513–519.  
52  
53  
54  
55  
56  
57  
58  
59  
60

- 1  
2  
3 49. van den Borne BE, Dijkmans BA, de Rooij HH, et al.: Chloroquine and  
4 hydroxychloroquine equally affect tumor necrosis factor-alpha, interleukin 6, and interferon-  
5 gamma production by peripheral blood mononuclear cells. *J Rheumatol* 1997; 24:55–60.  
6  
7  
8  
9  
10 50. Weber SM, Levitz SM: Chloroquine interferes with lipopolysaccharide-induced TNF-  
11 alpha gene expression by a non lysosomotropic mechanism. *J Immunol* 2000; 165:1534–  
12 1540.  
13  
14  
15  
16  
17 51. van den Borne BE, Dijkmans BA, de Rooij HH, et al.: Chloroquine and  
18 hydroxychloroquine equally affect tumor necrosis factor-alpha, interleukin 6, and interferon-  
19 gamma production by peripheral blood mononuclear cells. *J Rheumatol* 1997; 24:55–60.  
20  
21  
22  
23  
24 52. Broder A, Putterman C. Hydroxychloroquine use is associated with lower odds of  
25 persistently positive antiphospholipid antibodies and/or lupus anticoagulant in systemic lupus  
26 erythematosus. *J Rheumatol*. 2013;40(1):30-3.  
27  
28  
29  
30  
31 53. Raschi E, Borghi MO, Grossi C, et al.: Toll-like receptors: another player in the  
32 pathogenesis of the anti-phospholipid syndrome. *Lupus* 2008; 17:937–942.  
33  
34  
35  
36  
37 54. Doring Y, Hurst J, Lorenz M, et al.: Human antiphospholipid antibodies induce TNF  
38 alpha in monocytes via Toll-like receptor 8. *Immunobiology* 2010; 215:230–241.  
39  
40  
41  
42 55. Berman J, Girardi G, Salmon JE: TNF-alpha is a critical effector and a target for therapy  
43 in antiphospholipid antibody-induced pregnancy loss. *J Immunol* 2005; 174:485–490.  
44  
45  
46  
47 56. Kaplan YC, Ozsarfati J, Nickel C, Koren G. Reproductive outcomes following  
48 hydroxychloroquine use for autoimmune diseases: a systematic review and meta-analysis. *Br*  
49 *J Clin Pharmacol*. 2016 May;81(5):835-48.  
50  
51  
52  
53  
54  
55  
56  
57  
58  
59  
60

- 1  
2  
3  
4  
5  
6  
7  
8  
9 57. Götestam Skorpen C, Hoeltzenbein M, Tincani A, Fischer-Betz R, Elefant E, Chambers  
10 C, da Silva J, Nelson-Piercy C, Cetin I, Costedoat-Chalumeau N, Dolhain R, Förger F,  
11 Khamashta M, Ruiz-Irastorza G, Zink A, Vencovsky J, Cutolo M, Caeyers N, Zumbühl C,  
12 Østensen M. The EULAR points to consider for use of antirheumatic drugs before pregnancy,  
13 and during pregnancy and lactation. *Ann Rheum Dis*. 2016 May;75(5):795-810.  
14  
15  
16  
17  
18  
19  
20 58. Tarfaoui N, Autret-Leca E, Mazjoub S, Cissoko H and Jonville-Béra AP.  
21 Hydroxychloroquine During Pregnancy: a Review of Retinal Toxicity in the Newborns.  
22 *Thérapie* 2013; 68 (1): 43–47  
23  
24  
25  
26  
27 59. Brigham SA, Conlon C, Farquharson RG. A longitudinal study of pregnancy outcome  
28 following idiopathic recurrent miscarriage. *Hum Reprod*. 1999;14(11):2868-2871.  
29  
30  
31  
32  
33 60. The efficacy of hydroxychloroquine for obstetrical outcome in anti-phospholipid  
34 syndrome: Data from a European multicenter retrospective study. *Autoimmunity* 2015.  
35  
36  
37  
38  
39  
40  
41  
42  
43  
44  
45  
46  
47  
48  
49  
50  
51  
52  
53  
54  
55  
56  
57  
58  
59  
60



# BMJ Open

## Hydroxychloroquine for Prevention of Recurrent Miscarriage: Study Protocol for a Multicenter Randomized Placebo Controlled Trial

|                               |                                                                                                                                                                                                                                                                                                                                                                                                                                                                                                                                                                                                                                                                                                                                                                                                                                                                                                            |
|-------------------------------|------------------------------------------------------------------------------------------------------------------------------------------------------------------------------------------------------------------------------------------------------------------------------------------------------------------------------------------------------------------------------------------------------------------------------------------------------------------------------------------------------------------------------------------------------------------------------------------------------------------------------------------------------------------------------------------------------------------------------------------------------------------------------------------------------------------------------------------------------------------------------------------------------------|
| Journal:                      | <i>BMJ Open</i>                                                                                                                                                                                                                                                                                                                                                                                                                                                                                                                                                                                                                                                                                                                                                                                                                                                                                            |
| Manuscript ID                 | bmjopen-2018-025649                                                                                                                                                                                                                                                                                                                                                                                                                                                                                                                                                                                                                                                                                                                                                                                                                                                                                        |
| Article Type:                 | Protocol                                                                                                                                                                                                                                                                                                                                                                                                                                                                                                                                                                                                                                                                                                                                                                                                                                                                                                   |
| Date Submitted by the Author: | 02-Aug-2018                                                                                                                                                                                                                                                                                                                                                                                                                                                                                                                                                                                                                                                                                                                                                                                                                                                                                                |
| Complete List of Authors:     | <p>Pasquier, Elisabeth; Brest Univ Hosp, EA 3878 de Saint-martin, Luc; EA 3878 Groupe d'Etude de la Thrombose de Bretagne Occidentale</p> <p>marhic, Gisèle; Centre d'Investigation Clinique-INSERM 1412</p> <p>Chaleur, Celine; University Hospital Bellevue, Thrombosis Research Group</p> <p>Bohec, Caroline; Hôpital François Mitterand, Division of Gynaecology</p> <p>Bretelle, Florence; Université de la Méditerranée, Hôpital Nord, Division of Gynaecology</p> <p>Lejeune-Saada, Véronique; Hôpital d'Auch, Division of Gynaecology</p> <p>Hannigsberg, Jacob; Brest university hospital, division of gynecology</p> <p>Plu-bureau, Geneviève; APHP, hôpital Cochin, Division of Gynaecology</p> <p>Cogulet, Virginie; Brest university hospital, Pharmacy</p> <p>Merviel, Philippe; Brest university hospital, Division of Gynaecology</p> <p>Mottier, Dominique; Brest university Hospital</p> |
| Keywords:                     | Subfertility < GYNAECOLOGY, INTERNAL MEDICINE, Clinical trials < THERAPEUTICS                                                                                                                                                                                                                                                                                                                                                                                                                                                                                                                                                                                                                                                                                                                                                                                                                              |
|                               |                                                                                                                                                                                                                                                                                                                                                                                                                                                                                                                                                                                                                                                                                                                                                                                                                                                                                                            |

SCHOLARONE™  
Manuscripts

# Hydroxychloroquine for Prevention of Recurrent Miscarriage:

## Study Protocol for a Multicenter Randomized Placebo Controlled Trial

Elisabeth Pasquier,<sup>1</sup> Luc de Saint Martin,<sup>1</sup> Gisèle Marhic,<sup>2</sup> Céline Chauleur,<sup>3</sup> Caroline Bohec,<sup>4</sup> Florence Bretelle,<sup>5</sup> Véronique Lejeune-Saada,<sup>6</sup> Jacob Hannigsberg,<sup>7</sup> Geneviève Plu-Bureau,<sup>8</sup> Virginie Cogulet,<sup>9</sup> Philippe Merviel,<sup>7</sup> Dominique Mottier,<sup>10</sup>

### Author affiliations :

<sup>1</sup>EA 3878 Groupe d'Etude de la Thrombose de Bretagne Occidentale, Department of Internal Medicine and Chest Diseases, Brest University Hospital, Hôpital LaCavale Blanche, Brest, France

<sup>2</sup>Centre d'Investigation Clinique-INSERM 1412, Hôpital La Cavale Blanche, Brest, France

<sup>3</sup>Division of Gynaecology, Saint Etienne University Hospital, Saint Etienne, France

<sup>4</sup>Division of Gynaecology, Hôpital François Mitterand, Pau, France

<sup>5</sup>Division of Gynaecology, Université de la Méditerranée, Hôpital Nord, Marseille, France

<sup>6</sup>Division of Gynaecology, Hôpital d'Auch, Auch, France

<sup>7</sup>Division of Gynaecology, Brest University Hospital, Hôpital Morvan, Brest, France

<sup>8</sup>Division of Gynaecology, APHP, hôpital Cochin, Paris, France

<sup>9</sup>Central pharmacy, Brest University Hospital, Brest, France

<sup>10</sup>EA 3878 Groupe d'Etude de la Thrombose de Bretagne Occidentale, La Cavale Blanche Hospital, Brest, France

**Corresponding author** E-mail: Elisabeth.pasquier@chu-brest.fr

## ABSTRACT

**Introduction** Recurrent miscarriage (RM), defined by  $\geq 3$  consecutive losses during the first trimester of pregnancy, affects 1 to 2% of fertile couples. Standard investigations fail to reveal any apparent cause in ~ 50% of couples. However, on the basis of animal models and clinical studies, several hypotheses have been put forward concerning underlying mechanisms of RM: altered ovarian reserve, progesterone defect, thrombotic and/or endothelial dysfunction, immunological disturbances. Nonetheless, no study has yet reached conclusive beneficial clinical evidence for a potential treatment in unexplained RM. Hydroxychloroquine (HCQ) is a molecule with extensive safety data during pregnancy. HCQ pharmacological properties (e.g. anti-thrombotic, vascular protective, immunomodulatory, improved glucose tolerance, lipidlowering, antiinfectious) could be effective against some mechanisms of unexplained RM. Furthermore, eventhough clinical benefit of HCQ is suggested in prevention of thrombotic and late obstetric events in antiphospholipid (APL) syndrome, there is no data suggesting the benefit of HCQ in RM in the presence of APL antibodies.

**Methods and analysis** Taken all together and given the low cost of HCQ, the aim of this multicenter, randomized placebo-controlled, double-blind study is to investigate whether HCQ would improve the live-birth rate in women with RM, irrespective of maternal thrombophilic status: i) no known thrombophilia, ii) inherited thrombophilia or iii) APL antibodies. The primary end-point is a live and viable birth. After confirming eligibility and obtaining consent, 300 non-pregnant women will be randomized in 2 parallel groups for a daily oral treatment (HCQ 400 mg or placebo), initiated before conception and stopped at 10 weeks' gestation. If pregnancy doesn't occur after one year, the treatment will be stopped.

1  
2  
3 **Ethics and dissemination** Agreement from the French National Public Health and Drug  
4 Security Agency (160765A-22) and ethical approval from the Committee for the Protection of  
5 Persons of NORD-OUEST I (2016-001330-97) have been obtained.  
6  
7  
8  
9

10 **Trial registration number** ClinicalTrials.gov: NCT0316513  
11  
12  
13  
14  
15  
16  
17  
18  
19  
20  
21  
22  
23  
24  
25  
26  
27  
28  
29  
30  
31  
32  
33  
34  
35  
36  
37  
38  
39  
40  
41  
42  
43  
44  
45  
46  
47  
48  
49  
50  
51  
52  
53  
54  
55  
56  
57  
58  
59  
60

## STRENGTHS AND LIMITATIONS OF THIS STUDY

- Despite numerous fundamental research publications and clinical trials, the only recommendation that applies to follow-up of child bearing women suffering from RM relies on cocooning.
- This is the first randomized placebo-controlled study which aims to investigate whether oral hydroxychloroquine would improve the live-birth rate in women with recurrent miscarriage irrespective of maternal thrombophilic status.
- As a possible limitation, this study is based on the hypothesis that recurrent miscarriage often results from combined failures which could benefit from the pleiotropic effects of hydroxychloroquine.
- As hydroxychloroquine should probably be administered at least 2 menstrual cycles before conception to have an effect, women will be advised not to get pregnant during this period, but we do not plan to exclude those who will conceive too early.

## INTRODUCTION

### Background

RM is a common public health reproductive burden causing both physical and emotional distress. To date there is no treatment whose benefit has been clearly proved, even in the presence of well-known risk factors of RM. Most importantly, the absence of benefit has been clearly demonstrated for some treatments that are yet empirically proposed.

### *Unexplained Recurrent Miscarriage (RM)*

A sporadic miscarriage is clinically detected in approximately 10% to 15% of pregnancies. Fetal development usually stops before 10 weeks.<sup>1</sup> Given the recurrent miscarriage (RM) frequency among fertile couples (1% to 2%) being significantly higher than the expected random one (153 = 0.34 %), RM is most often defined as  $\geq 3$  consecutive losses. Apart from the detection of a lethal chromosomal abnormality on products of conception, the underlying mechanism of loss remains unknown in most cases. The rate of normal embryonic karyotypes in RM steadily increases from the third loss, suggesting alternative mechanisms than meiotic aberrations.<sup>2</sup> Standard investigations fail to reveal any apparent cause in ~50% of the women. However, On the basis of animal models and clinical studies, several hypotheses have been put forward. Here, we focus on thrombosis and both endothelial and immune dysfunctions. Those could be targeted by pharmacological properties of hydroxychloroquine (HCQ).

An association with some inherited thrombophilia has been reported (factor V Leiden, mutation G20210A of the prothrombin and protein S deficiency), although the odds ratio were most often  $\leq 2$ .<sup>3</sup> Animal models have demonstrated that some actors of the haemostatic system may participate in normal implantation and placental development regardless of the

1  
2  
3 coagulation process.<sup>4,5</sup> In humans, a basal prothrombotic state outside of pregnancy has been  
4  
5 measured in women with previous RM and without known thrombophilia.<sup>6-8</sup>This relative  
6  
7 prothrombotic state, measured at distance of any obstetrical event, could reflect chronic  
8  
9 endothelium damage in those women.<sup>9,10</sup>Notwithstanding, the clinical trials that have assessed  
10  
11 antithrombotic treatments (aspirin initiated before or after conception, eventually combined  
12  
13 with LMWH, or LMWH alone initiated after pregnancy diagnosis) did not show any benefit  
14  
15 in prevention of further loss.<sup>11-14</sup>Likewise, no benefit of LMWH has been shown in the  
16  
17 subgroup of women with inherited thrombophilia (TIPPS study).<sup>15</sup>However, we emphasize  
18  
19 that the subcutaneous route of LMWH administration does not allow assessing this treatment  
20  
21 at the critical time of implantation onset in fertile women. Indeed, the injections cannot be  
22  
23 routinely initiated before 5 weeks' gestation.  
24  
25

26  
27 Regarding immune dysfunction, apart from the detection of many auto-antibodies  
28  
29 (antiphospholipid, anti-thyroid),<sup>16</sup> attention is now focused on natural killer cells, whose  
30  
31 temporal and spatial distribution in the uterine mucosa suggests that they contribute to control  
32  
33 trophoblast invasion and cytokine response at the maternal-fetal interface (balances Th-1 / Th-  
34  
35 2 and Th-17 / T-reg). Th-2 and T-reg preponderance in normal pregnancy shifts to Th-1 and  
36  
37 Th-17 predominance in RM.<sup>17,18</sup> Otherwise, an overexpression of TOLL receptors in decidua  
38  
39 was observed in women with RM, especially TLR4 and TLR9 receptors.<sup>19</sup>  
40  
41 Immunomodulatory treatments have therefore been proposed and assessed without conclusive  
42  
43 results (paternal leukocyte immunization,<sup>20</sup> intravenous immunoglobulins,<sup>21</sup> Small doses of  
44  
45 corticosteroids.)<sup>22</sup>  
46  
47

48  
49 Despite numerous fundamental research publications and clinical trials, the only current  
50  
51 recommendation for follow-up of child bearing women suffering from unexplained RM relies  
52  
53 on cocooning.<sup>17,23</sup>  
54  
55  
56  
57  
58  
59  
60

### ***RM in the presence of antiphospholipid (APL) antibodies***

Antiphospholipid syndrome (APS) is diagnosed in the presence of persistent, above the 99th percentile, APL levels and of at least one clinical manifestation (obstetrical, arterial or venous thrombosis). «Three or more unexplained consecutive spontaneous abortions before the 10th week of gestation, with maternal anatomic or hormonal abnormalities and paternal and maternal chromosomal causes excluded »<sup>24</sup> delineates one of the possible manifestation of APS. Even though RM is one accepted clinical manifestation of APS, its specificity is low, as compared to the occurrence of fetal death after 10 weeks of amenorrhea.<sup>24</sup> The benefit of low dose aspirin and/or LMWH or heparins for secondary prevention of RM has not been demonstrated in women who present with APL antibodies and no other clinical manifestation of APS.<sup>25</sup> The HEPASA study found no benefit of combination therapy of LMWH and low dose aspirin in women who presented with APL, without arterial or venous thrombosis history, and who had at least two fetal losses before 32 weeks of amenorrhea.<sup>25</sup> As a consequence, no clinical evidence has been drawn for an optimal management of these women.

### ***Rationale for hydroxychloroquine (HCQ)***

Chloroquine and HCQ are used for centuries to treat malaria. Because of a more favorable usage profile and immunomodulatory properties, HCQ use became common for treatment of autoimmune and inflammatory diseases. Other therapeutic properties of HCQ have since been discovered, or rather rediscovered, and assessed in a more consistent manner. The following HCQ properties could be effective against mechanisms of RM.



1  
2  
3 Since 30 years, benefit of HCQ to prevent venous thromboembolism (VTE) has been  
4 suspected<sup>26-35</sup> i) among patients with SLE<sup>26,31</sup> and ii) among all-comer patients, free of  
5 autoimmune disease, after orthopedic surgery.<sup>27-30</sup> Thus, before the use of LMWH, HCQ was  
6 assessed in the 1970s in the prevention of VTE events after orthopedic surgery. The results of  
7 randomized trials,<sup>28-30</sup> (around 10 000 patients included) led to the conclusion that HCQ was  
8 beneficial in preventing VTE after orthopedic surgery.<sup>28</sup> In patients with SLE, in the presence  
9 or absence of APL antibodies, studies have suggested the benefit of HCQ for the primary  
10 prevention of both arterial and venous thrombotic events.<sup>26,31-33</sup> In primary APS, HCQ  
11 reduced the thrombus size after vessel injury in mice<sup>34</sup> and would improve the secondary  
12 prevention of VTE in humans, in comparison to oral anticoagulants used alone.<sup>35</sup> The  
13 antithrombotic action of HCQ would be inherent to some biological effects (in the absence<sup>36-</sup>  
14<sup>38</sup> or in the presence<sup>39-40</sup> of APL antibodies). Otherwise, much data support an endothelium  
15 protective action of HCQ via anti-diabetic,<sup>41</sup> lipidlowering,<sup>42</sup> anti-oxidant<sup>43</sup> effects or a direct  
16 endothelial protection, via ERK5 protein kinase activation.<sup>44</sup>

17  
18 Regarding immunomodulation, HCQ has an impact on the innate immunity by  
19 inhibition of the activation of some ToLL receptors (3,7,9).<sup>45-47</sup> HCQ decreases the circulating  
20 levels of interleukine 1, 2,<sup>48</sup> 6,<sup>49</sup> TNF<sup>49,50</sup> and, interferon- $\gamma$ ,<sup>51</sup> promoting the TH2 processes  
21 that prevail in a "normal pregnancy". Otherwise, HCQ decreases APL plasma levels<sup>52</sup> and  
22 interferes with both endothelial cell activation and TNF- $\alpha$  production, 2 major key pathways  
23 involved in APS.<sup>53-55</sup>

24  
25 We also outline the well-known anti-infectious action of HCQ which originates from  
26 the alkalization of intracellular acidic vesicles and might inhibit the growth of intracellular  
27 microorganisms. This could act against chronic endometritis, additional mechanism suspected  
28 in RM.

1  
2  
3 Remarkably, the use of HCQ (and closely related molecules) as anti-malarial or in auto-  
4 immune diseases during pregnancy<sup>56,58</sup> and lactation<sup>57</sup> have provided extensive safety data  
5 during pregnancy and even during breast-feeding.  
6  
7

8  
9  
10 Otherwise, oral administration of HCQ facilitates its prescription early, before conception,  
11 thus enabling fetal exposure from the very beginning of time period at risk for activation of  
12 RM underlying mechanisms. Noteworthy, HCQ has never been evaluated in the indication of  
13 RM with or without APL antibodies.  
14  
15  
16  
17

18  
19 Taken all together and given that RM is a stereotyped clinical entity whatever the maternal  
20 thrombophilic status, we aimed at evaluating the role of HCQ in prevention of RM, with or  
21 without APL antibodies or inherited thrombophilia.  
22  
23  
24  
25  
26  
27  
28  
29  
30  
31  
32  
33  
34  
35  
36  
37  
38  
39  
40  
41  
42  
43  
44  
45  
46  
47  
48  
49  
50  
51  
52  
53  
54  
55  
56  
57  
58  
59  
60

## STUDY OBJECTIVES

### *Primary objective*

The aim of this placebo-controlled, double-blind trial is to investigate whether HCQ (orally administered before conception until 10 weeks of gestational age) would improve the live-birth rate of 15% or more, in women with previous RM, irrespective of their biological thrombophilic status.

### *Secondary objectives*

We aim to investigate whether:

- HCQ effect would be different among women with inherited thrombophilia or APL antibodies
- HCQ would have an impact on the occurrence of some pregnancy events (early miscarriage, intrauterine fetal death, placental vascular disease)
- The impact of HCQ would be different in subgroups of women at higher or lower risk of recurrence according to the number of previous miscarriages (= 3 ou > 3), the maternal age ( $\geq 35$  ou < 35 ans), the parity: previous live-birth, a previous late fetal death after 10 weeks' gestation.

We aim to confirm that HCQ has no negative impact on the chance of getting pregnant, the newborn (gestational age, birth weight, survival at 28 days, congenital abnormalities), the child at 6 months.

## METHODS

### ***Study design***

This is a prospective, randomized 1:1 placebo-controlled, double-blind, and French multi-centre trial of phase III, with 2 parallel-groups (HCQ 400 mg or placebo). At randomization, the minimization method will be used to balance between the 2 groups and 2 main determinants of miscarriage recurrence: maternal age ( $\leq 35$  or  $>35$  years) and number of previous losses (3 or  $\geq 4$ ).

### ***Population***

The study population consists of women trying to conceive and who had experienced at least 3 consecutive miscarriages at the first trimester of pregnancy (normal parental karyotypes, no uterine cavity abnormality that might explain the losses). Those women are followed-up by their gynecologist or general practitioner who refers them to one of the RM specialized unit participating in the study for screening. At the inclusion visit, the medical investigator checks inclusion and exclusion criteria of eligible women.

### ***Inclusion criteria***

- Women aged between 18 and 37 inclusive,
- Women trying to conceive,
- Women with at least 3 previous consecutive miscarriages in the first pregnancy trimester, of unknown origin defined as:
  - Normal parental karyotypes,
  - No uterine cavity abnormality that might explain RM (ultrasound scan, hysteroscopy or hystero-graphy),

- In case of persistent positive APL antibodies according to the biological criteria of Myakis:<sup>24</sup> no previous thrombotic or obstetrical event defined in APS<sup>24</sup>, except for RM in the first trimester of pregnancy, .
- Women who have given their informed consent.

### *Exclusion criteria*

- Ongoing pregnancy,
- Normal pregnancy (live and viable birth) since the last miscarriage,
- Abnormal parental karyotype,
- Uterine cavity abnormality that might explain RM in the first trimester of pregnancy,
- Antiphospholipid Syndrome defined as both:
  - persistent positive APL antibodies: lupus anticoagulant and/or APL (anticardiolipin or anti  $\beta$ 2 GPI, IgG or IgM) titers > 99th percentile or >40 with at least 12 weeks interval between two positive determinations (persistent antibodies) AND,
  - a specific clinical setting of APS (thrombotic or obstetrical, apart from RM in the first trimester of pregnancy) according to Myakis criteria.<sup>24</sup>
- Known contraindication to a treatment by HCQ (retinopathy, hypersensitivity to chloroquine or HCQ, G6PD deficiency, acute intermittent porphyria, chronic liver or kidney insufficiency, extensive cutaneous psoriasis not controlled by local treatment, significant chronic digestive or hematologic disease) or known rare disorder of lactose metabolism (excipient),
- Past history of epilepsy or psychotic disorders,
- Indication to a treatment by HCQ according to the MA (rheumatoid arthritis, Lupus, solar eczema),

- Previous exposure >4 years to chloroquine or HCQ,
- Previous inclusion in this study,
- Woman unable to consent, protected under the terms of the law, or woman deprived of liberty by judicial or administrative decision,
- non affiliation to the social security system,
- Impossible follow-up.

### ***Allocation, randomization and blinding***

After inclusion and obtaining written consent, an identification number is assigned to the patient through a secure server providing access to electronic case report forms generated by the CIC Brest (via the "Capture System" software). The randomization is done using the "Capture System" software with implementation of a randomization with minimization to balance between the 2 treatment groups according to the main determinants of miscarriage recurrence: age ( $\leq 35$  or  $>35$  years) and number of miscarriages (3 or  $\geq 4$ ).

The patient, the investigator and all medical and paramedic professionals taking care of the patient will be blinded to the treatment group. The packaging of placebo and HCQ will be provided in the form of capsules with identical external shape and packaging. Information on the correspondence between treatment group and the patient number will be held by both the central pharmacy of Brest CHRU and the Data Management Unit.

### ***Intervention***

Included patients are assigned to receive either 400 mg of oral HCQ per day, administered in 2 divided doses of 200 mg or 2 daily doses of oral placebo. Thus, treatment is initiated before

1  
2  
3 conception and stopped at 10 weeks' gestation (weeks of amenorrhea) or after one year of  
4  
5 treatment in the absence of pregnancy.  
6  
7  
8  
9

### 10 ***Rationale for choosing oral 400 mg daily HCQ***

11  
12  
13 It is the usual route of administration and dose for indications specified by the Marketing  
14 authorization (MA). This choice of dose comes from the evaluation of the risk-benefit balance  
15 in the MA indications and, over all, from the fact that data of good tolerance have been  
16 compiled to this (usual) dosage in literature. Otherwise, in most cases, fetal development  
17 stops before 10 weeks of amenorrhea. Treatment exposure is essential from the very  
18 beginning of implantation, a developmental stage that can potentially be disturbed by the  
19 mechanisms responsible for miscarriage. The oral administration allows starting the treatment  
20 before conception. This drug has a long half-life (from 30 to 60 days). Its full effect is  
21 obtained only after certain duration of exposure. That is why its administration is required  
22 before conception and its discontinuation after 10 weeks of amenorrhea, i.e. before the end of  
23 the first trimester of pregnancy which is at the highest risk for RM.  
24  
25  
26  
27  
28  
29  
30  
31  
32  
33  
34  
35  
36  
37  
38  
39  
40

### 41 ***Treatments frequently given in combination***

- 42  
43  
44 ➤ Folic acid and other vitamin supplements,
- 45  
46 ➤ Aspirin at low dose, which could be given by some investigators to prevent the  
47 recurrence of vasculo-placental disease (preeclampsia, intra-utero growth restriction)  
48 or as part of a primary prevention of vasculo-placental events in women with high  
49 levels of persistent APL antibodies.  
50  
51  
52  
53  
54  
55  
56  
57  
58  
59  
60

### ***Study plan and procedures***

Before pregnancy, women are monthly contacted by phone. The non pregnant women are systematically seen in consultation after 6 and 12 months of treatment. In the absence of pregnancy after one year, the treatment will be withdrawn and patients will be contacted by phone at 14 months and 18 months (End-of-Study visit).

During pregnancy, women are monthly seen in consultation (4 first months) or contacted by phone. The treatment is withdrawn at 10 weeks' gestation or earlier in case of pregnancy loss.

After delivery, the women are seen in consultation at ~2 months, and contacted by phone at 6 months (End-of-Study visit).

Four tubes of 2.7 ml with sodium citrate and 4 tubes SST of 5 ml (for plasma and serum bank, respectively) are collected at both the inclusion visit and the visit of pregnancy onset or the visit planned after one year of treatment in the absence of pregnancy. Additionally 2 tubes EDTA of 5 ml are collected for DNA bank at inclusion. The biological collection of plasma is carried out within 3 hours after receipt of tubes. DNA extraction is carried out within one week of collection (and at the latest within a month if the sample is frozen at  $-80^{\circ}\text{C}$  pending extraction). Those specimens are designed to identify prognostic factors (including thrombophilic work-up) for efficacy of the study treatment.

### ***End points***

The primary end point is a live and viable birth.

The secondary end points are:

- A live and viable birth, for the subgroup analyses,



- The occurrence of miscarriage, in-utero fetal death, placental vascular disease, premature delivery,
- Gestational age at miscarriage,
- Concerning the child: gestational age and weight at birth, survival at 28 days, safety data at 6 months of life, congenital abnormality.

### ***Safety considerations, safety monitoring and AE reporting***

Apart from, adverse events (AE) and serious adverse events (SAE), some safety parameters will be systematically recovered: CBC, visual and neurological symptoms for women and reports of ultrasound and post-natal medical visits for children. Adverse events (AE) are defined as any untoward medical occurrence in a person who consents to biomedical research whether this event is related or not to the research or experimental drug on which this research addresses. The gravity of serious adverse events (SAE) is defined by one of the following findings: death, life-threatening situation, significant or sustained incapacity or disability, hospitalization, prolongation of hospitalization, deformity or birth defect, potentially serious event. Any SAE or event of interest, regardless of its causal relationship with the trial treatment or the research, must be reported to the sponsor, as soon as possible and the latest 24 hrs after their occurrence for SAE. The investigator is in charge of noting and reporting all SAE occurring during the study, from the date of the signed informed consent, during the study's expected duration of follow up (6 months after the treatment cessation for women and at age 6 months for newborns). Furthermore, regardless of the event occurrence deadline after the end of the study, all SAE that may be due to the research must be declared to the sponsor when there is no other cause and effect accounted for (such as serious events that may occur long after exposure to the drug, such as cancers or congenital abnormalities).

1  
2  
3 Some AE and SAE are expected and can be linked to i) pregnancy, ii) the disease (occurrence  
4 of another miscarriage) or study treatment (benign, adverse reaction AR, as digestive  
5 symptoms or severe, serious adverse reaction SAR as skin reaction, which requires to  
6 immediately stop the treatment).  
7  
8  
9  
10

### 11 12 13 14 15 ***Independent Data and safety monitoring Board (IDSMB)*** 16

17  
18 The IDSMB comprises 8 members without competing interests, not directly involved in other  
19 aspects of the trial and independent from the sponsor: 7 voting members, experts in  
20 complementary fields of the pathology and clinical trials (internal medicine, methodology,  
21 specialist of teratogenic agents, neonatology, hematology, ophthalmology) and a non-voting  
22 independent statistician. IDSMB monitors the data that affects patient safety, provides  
23 independent expertise for the evaluation of adverse events (AE) occurring during the study,  
24 expresses an opinion concerning the benefit / risk ratio and provides recommendations in  
25 order to help the steering committee to take decisions on protocol modification or early  
26 termination of the study. The members of the IDSMB will have to meet every 20 inclusions.  
27 The IDSMB will transmit its recommendations to the steering Committee, which decides  
28 whether or not to stop the study. Given the safety data and the treatment benefit, several  
29 different recommendations can be provided by the IDSMB: i) continuation of study without  
30 protocol modification, ii) continuation of study with modification of protocol, iii) temporarily  
31 discontinuation of inclusions, iiiii) early termination of the study  
32  
33  
34  
35  
36  
37  
38  
39  
40  
41  
42  
43  
44  
45  
46  
47  
48

49 Over the course of study, the IDSMB will have an advisory role in reassessing the benefit/risk  
50 ratio of the study.  
51  
52  
53  
54  
55  
56  
57  
58  
59  
60

### *Number of patients*

The total number of scheduled patients to be recruited is 300, on the basis of the following hypotheses:

- 80% of the included women should get pregnant (ALIFE study).<sup>11</sup>
- Among women who will get pregnant, we suppose that the rate of achieved pregnancy will be of 70% in the placebo group (PREFIX study).<sup>14</sup>

To demonstrate a minimal clinically important difference of 15% in live-birth rates on HCQ (i.e. a 50% relative risk reduction in pregnancy loss), we need to enroll 300 women for a power of 80%, and a two-tailed alpha risk of 5%.

The anticipated duration of recruitment is 3 years and the duration of participation of each patient: from 7 to 29 months.

### *Analyses plan*

Analyses will be firstly conducted on an intention to treat basis for all women who have started pregnancy. Hierarchical analysis including three steps is planned :comparison of the number of live and viable births, between the two treatment groups i) among all the women, ii) among women without known APL antibodies, iii) among women without known thrombophilia (APL or inherited thrombophilia). We plan to adjust for age and number of previous losses if the difference between the two treatment groups is statistically significant ( $p < .05$ ).

Secondary analyses will be conducted on an intention to treat mode:

1  
2  
3 For all included women, comparison of the number of live and viable births between the two  
4  
5 treatment groups.  
6

7  
8 Among women who will get pregnant:  
9

- 10  
11 ➤ Measure of treatment effect in women at higher risk of further miscarriage,  
12 according to the presence of thrombophilia, past history of intrauterine fetal  
13 death after 10 week's gestation, past history of miscarriage, > 3 previous  
14 miscarriage or, no previous newborn baby,  
15  
16  
17  
18  
19 ➤ Comparison between the two treatment groups of the occurrence of several  
20 obstetrical events (miscarriage and intrauterine fetal death, vasculo placental  
21 disease, premature birth),  
22  
23  
24  
25  
26 ➤ Comparison between the two treatment groups of newborn clinical data  
27 (gestation time at delivery, birth weight adjusted to the gestation time, number  
28 of newborn babies living at 28 days and congenital abnormalities.  
29  
30  
31  
32

33 A "per-protocol analysis" (primary endpoint) will include only patients properly exposed to  
34 the study treatment, that is i) at least during a whole menstrual cycle before pregnancy onset  
35 and until 10 weeks of amenorrhea ii) compliance  $\geq$  80%.  
36  
37  
38  
39

40 No unblinded interim analysis is planned.  
41  
42

43 The biological collection will be carried out by the CRB of the CHRU of BREST and  
44 integrated into the collection "thrombosis" declared to the Ministry (2008-214/ DC-2009-  
45  
46  
47  
48  
49  
50  
51  
52  
53  
54  
55  
56  
57  
58  
59  
60

## DISCUSSION

1  
2  
3 To date, there has not yet been an optimal therapy with conclusive clinical benefit for  
4 unexplained RM, in the absence or presence of inherited thrombophilia. Providing some  
5 psychological support seems to be the only available therapy for women with unexplained  
6 RM. Although the probability of a further normal pregnancy seems high, (~70% at age 32  
7 after 3 consecutive miscarriages),<sup>59</sup> the proposed therapeutic interventions are sometimes  
8 excessive, (e.g. possible side effects) and costly (e.g. intravenous immunoglobulins, assisted  
9 procreation). Therefore, it is of utmost importance to investigate other therapeutic options.  
10  
11  
12  
13  
14  
15  
16  
17

18 In RM women with high titers of APL antibodies but without any other previous clinical  
19 event listed in APS (thrombotic or obstetric event), benefit of antithrombotic treatment  
20 (aspirin or LMWH) remains controversial. Clinical benefit of HCQ has not been demonstrated  
21 in prospective studies with robust methodology.<sup>60</sup>  
22  
23  
24  
25  
26  
27

28 In conclusion, the benefit/risk ratio and low cost are strong incentives for assessment of HCQ  
29 in unexplained RM irrespective of maternal thrombophilic status.  
30  
31  
32  
33  
34  
35

## 36 **SPONSORSHIP**

37  
38  
39 This study was sponsored by Brest University Hospital.  
40  
41  
42  
43  
44  
45

## 46 **PATIENT AND PUBLIC INVOLVEMENT**

47  
48  
49 Patients were not involved in the design of the study.  
50  
51  
52  
53  
54

## 55 **ETHICS, REGULATORY APPROVALS AND DISSEMINATION**

1  
2  
3 Agreement from the French National Public Health and Drug Security Agency (160765A-22)  
4 and ethical approval from the Committee for the Protection of Persons of NORD-OUEST I ()  
5  
6  
7 have been obtained on November 4<sup>th</sup> 2016 and March 2<sup>nd</sup> 2017, respectively.  
8  
9

10 This trial is registered at [www.ClinicalTrials.gov](http://www.ClinicalTrials.gov) as # NCT0316513. and the French National  
11  
12 Health and Drug Safety Agency (EudraCT # 2016-001330-97).  
13  
14

15 The necessary trial insurance is provided by HDI Gerling Industrie Versicherung (PARIS).  
16  
17  
18  
19  
20

## 21 **Acknowledgements**

22  
23  
24 The authors thank the clinical network Gynobs29 of the gynecologists and obstetricians of  
25  
26 West Brittany and the national research network GOCIC “Réseau Gynécologie Obstétricale  
27  
28 des Centres d’Investigation Clinique”. They also thank Zarrin Alavi (Inserm, CIC 1412) for  
29  
30 proofreading and all the other investigators of the study: Dr Tiphaine Raia-Barjat  
31  
32 (Gynecology, Saint-Etienne), Dr Nathalie Lesavre (Centre d’Investigation Clinique, Hôpital  
33  
34 Nord, Marseille), Arsène Mékinian (APHP, hospital Saint-Antoine, Paris), Norbert Winer  
35  
36 (Gynecology, Nantes), Charles Bellot and Gaelle Le Foll (Gynecology, Quimper), Céline  
37  
38 Pimentel (gynecology, Rennes), Aude Bourtembourg (Gynecology, Besançon) Véronique  
39  
40 Debarge ( Gynecology, Lille), Dominique Luton (APHP, Bichat).  
41  
42  
43

## 44 **Contributors**

45  
46  
47 EP conceived and designed the study. EP drafted the original grant proposal and trial  
48  
49 protocol. LDSM provides methodological and statistical expertise. GM has assisted in  
50  
51 developing the protocol, helped with implementation and has responsibilities for day-to-day  
52  
53 running of the trial including participant recruitment, data collection and liaising with other  
54  
55 sites. JH and PM have helped with protocol implementation. CB, CC, FB, VLS, GPB, DM  
56  
57  
58  
59  
60

1  
2  
3 have participated in the design of the study. VC coordinates treatment production and  
4 dispensation. All authors critically reviewed and approved the final version of the manuscript.  
5  
6  
7  
8  
9

10 **Funding** The study was supported by a grant from the French Ministry of Health (PHRCN-  
11 17-0573).  
12  
13  
14

15  
16  
17  
18 **Competing interests** None declared.  
19  
20  
21  
22  
23

24 **Patient consent** Obtained.  
25  
26  
27  
28  
29  
30  
31  
32  
33  
34  
35  
36  
37  
38  
39  
40  
41  
42  
43  
44  
45  
46  
47  
48  
49  
50  
51  
52  
53  
54  
55  
56  
57  
58  
59  
60

## References

1. Branch DW, Gibson M, Silver RM. Clinical practice. Recurrent miscarriage. *N Engl J Med.* 2010;363(18):1740-1747.
2. Ogasawara M, Aoki K, Okada S, Suzumori K. Embryonic karyotype of abortuses in relation to the number of previous miscarriages. *Fertil Steril* 2000; 73: 300–4.
3. Rey E, Kahn SR, David M, Shrier I. Thrombophilic disorders and fetal loss: a meta-analysis. *Lancet.* 2003;361(9361):901-908.
4. Isermann B, Sood R, Pawlinski R, Zogg M, Kalloway S, Degen JL, et al. The thrombomodulin-protein C system is essential for the maintenance of pregnancy, *Nat. Med.* 9 (3) (2003) 331–337.
5. Li W, Zheng X, Gu JM, Ferrel GLL, Brady M, Esmon NL, et al, Extraembryonic expression of EPCR is essential for embryonic viability, *Blood* 106 (8) (2005) 2716–2722.
6. Laude I, Rongières-Bertrand C, Boyer-Neumann C, et al. Circulating procoagulant microparticles in women with unexplained pregnancy loss: a new insight. *Thromb Haemost.* 2001;85(1):18-21.
7. Rai R, Tuddenham E, Backos M, et al. Thromboelastography, whole-blood haemostasis and recurrent miscarriage. *Hum Reprod.* 2003;18(12):2540-2543.
8. de Saint Martin L, Duchemin J, Bohec C, et al. Increased thrombin generation measured in the presence of thrombomodulin in women with early pregnancy loss. *Fertil Steril.* 2011;95(5):1813-1815, e1.



- 1  
2  
3 9. Pasquier E, De Saint Martin L, Bohec C, Collet M, Dignat George F, Mottier D.  
4 Unexplained pregnancy loss: a marker of basal endothelial dysfunction? *Fertil Steril*. 2013  
5 Oct;100(4):1013-7.  
6  
7
- 8  
9  
10 10. Kharazmi E, Dossus L, Rohrmann S, Kaaks R. Pregnancy loss and risk of cardiovascular  
11 disease: a prospective population-based cohort study (EPIC-Heidelberg). *Heart*. 2011;  
12 97(1):49-54.  
13  
14
- 15  
16  
17 11. Kaandorp SP, Goddijn M, van der Post JA, et al. Aspirin plus heparin or aspirin alone in  
18 women with recurrent miscarriage. *N Engl J Med*. 2010; 362(17):1586-1596.  
19  
20
- 21  
22 12. Clark P, Walker ID, Langhorne P, et al. SPIN (Scottish Pregnancy Intervention) study: a  
23 multicenter, randomized controlled trial of low-molecular-weight heparin and low-dose  
24 aspirin in women with recurrent miscarriage. *Blood*. 2010;115(21):4162-7.  
25  
26  
27
- 28  
29  
30 13. Visser J, Ulander VM, Helmerhorst FM, et al. Thromboprophylaxis for recurrent  
31 miscarriage in women with or without thrombophilia. *HABENOX: a randomised multicentre*  
32 *trial*. *Thromb Haemost*. 2011;105(2):295-301.  
33  
34  
35
- 36  
37  
38 14. Pasquier E, de Saint Martin L, Bohec C, Chauleur C, Bretelle F, Marhic G, et al.  
39 Enoxaparin for prevention of unexplained recurrent miscarriage: a multicenter randomized  
40 double-blind placebo-controlled trial. *Blood*. 2015;125: 2200-5.  
41  
42  
43
- 44  
45  
46 15. Rodger MA, Hague WM, Kingdom J, et al; TIPPS Investigators. Antepartum dalteparin  
47 versus no antepartum dalteparin for the prevention of pregnancy complications in pregnant  
48 women with thrombophilia (TIPPS): a multinational open-label randomised trial. *Lancet*.  
49 2014;384(9955): 1673-1683.  
50  
51  
52  
53  
54  
55  
56  
57  
58  
59

- 1  
2  
3 16. van den Boogaard E, Vissenberg R, Land JA, van Wely M, van der Post JA, Goddijn M,  
4 Bisschop PH. Significance of (sub)clinical thyroid dysfunction and thyroid autoimmunity  
5 before conception and in early pregnancy: a systematic review, *Hum. Reprod* 2011; 17(5):  
6  
7 605–619  
8  
9
- 10  
11  
12 17. Rai R, Regan L. Recurrent miscarriage. *Lancet*. 2006;368(9535):601-611.  
13
- 14  
15 18. Figueiredo AS and Schumacher A. The T helper type 17/regulatory T cell paradigm in  
16 pregnancy. *Immunology*. 2016; 148:13–21.  
17
- 18  
19 19. Kang X, Zhang X, Liu Z, Xu H, Wang T, He L, Zhao A. Excessive TLR9 signaling  
20 contributes to the pathogenesis of spontaneous abortion through impairment of Treg cell  
21 survival by activation of Caspase 8/3. *Int Immunopharmacol*. 2015;29(2):285-92.  
22  
23  
24  
25
- 26  
27 20. Porter TF, LaCoursiere Y, Scott JR. Immunotherapy for recurrent miscarriage. *Cochrane*  
28 *Database Syst Rev*. 2006;2:CD000112  
29
- 30  
31 21. Egerup P, Lindschou J, Gluud C, Christiansen OB; ImmuReM IPD Study Group. The  
32 Effects of Intravenous Immunoglobulins in Women with Recurrent Miscarriages: A  
33 Systematic Review of Randomised Trials with Meta-Analyses and Trial Sequential Analyses  
34 Including Individual Patient Data. *PLoS One*. 2015 Oct 30;10(10 ):e0141588  
35  
36  
37  
38
- 39  
40 22. Tang AW, Alfirevic Z, Turner MA, Drury JA, Small R, Quenby S. A feasibility trial of  
41 screening women with idiopathic recurrent miscarriage for high uterine natural killer cell  
42 density and randomizing to prednisolone or placebo when pregnant. *Hum Reprod*. 2013  
43 Jul;28(7):1743-52  
44  
45  
46  
47  
48  
49
- 50  
51 23. Liddell HS, Pattison NS, Zanderigo A. Recurrent miscarriage—outcome after supportive  
52 care in early pregnancy. *Aust N Z J Obstet Gynaecol* 1991; 31: 320–22.  
53  
54  
55  
56  
57  
58  
59

- 1  
2  
3 24. Miyakis S, Lockshin MD, Atsumi T, et al. International consensus statement on an update  
4 of the classification criteria for definite antiphospholipid syndrome (APS). *JThromb Haemost.*  
5 2006;4(2):295-306.  
6  
7  
8  
9  
10 25. Laskin CA, Spitzer KA, Clark CA, Crowther MR, Ginsberg JS, Hawker GA, Kingdom  
11 JC, Barrett J, Gent M. Low molecular weight heparin and aspirin for recurrent pregnancy loss:  
12 results from the randomized, controlled HepASA Trial. *J Rheumatol.* 2009 Feb;36(2):279-87.  
13  
14  
15  
16  
17 26. Wallace DJ. Does hydroxychloroquine sulphate prevent clot formation in systemic lupus  
18 erythematosus? *ArthritisRheum*1987; 30(12):1435–6.  
19  
20  
21  
22 27. Johansson E, Forsberg K, Johnsson H. Clinical and experimental evaluation of the  
23 thromboprophylactic effect of hydroxychloroquine sulphate after total hip  
24 replacement. *Haemostasis*1981;10(2):89–96.  
25  
26  
27  
28  
29 28. Johnson R, Charnley J. Hydroxychloroquine in prophylaxis of pulmonary embolism  
30 following hip arthroplasty. *Clin Orthop Relat Res* 1979;144:174–7.  
31  
32  
33  
34 29. Carter AE, Eban R. Prevention of postoperative deep venous thrombosis in legs by orally  
35 administered hydroxychloroquine sulphate. *Br Med J* 1974; 3:94-95.  
36  
37  
38  
39 30. Wu TK. Prophylaxis of deep venous thrombosis by hydroxychloroquine sulfate and  
40 heparin. *Surg Gynecol Obstet* 1977;145:714–718.  
41  
42  
43  
44 31. Ruiz-Irastorza G, Egurbide MV, Pijoan JI, et al. Effect of antimalarials on thrombosis and  
45 survival in patients with systemic lupus erythematosus. *Lupus* 2006; 15:577–583.  
46  
47  
48  
49 32. Tektonidou MG, Laskari K, Panagiotakos DB, Moutsopoulos HM. Risk factors for  
50 thrombosis and primary thrombosis prevention in patients with systemic lupus erythematosus  
51 with or without antiphospholipid antibodies. *Arthritis Rheum* 2009; 61:29–36.  
52  
53  
54  
55  
56  
57  
58  
59  
60

- 1  
2  
3 33. Jung H, Bobba R, Su J, et al. The protective effect of antimalarial drugs on  
4 thrombovascular events in systemic lupus erythematosus. *Arthritis Rheum* 2010; 62:863–868.  
5  
6  
7  
8 34. Edwards MH, Pierangeli S, Liu X, et al. Hydroxychloroquine reverses thrombogenic  
9 properties of antiphospholipid antibodies in mice. *Circulation* 1997; 96:4380–4384.  
10  
11  
12  
13 35. Schmidt-Tanguy A., et al. Anti-thrombotic effects of hydroxychloroquine in primary  
14 antiphospholipid syndrome patients. *J Thromb Haemost.* 2013 Oct;11(10):1927-9  
15  
16  
17  
18 36. Madow BP. Use of anti-malarial drugs as “desludging” agents in vascular disease  
19 processes. *JAMA* 1960, 172:1630–1633.  
20  
21  
22  
23 37. Ernst E, Rose M, Lee R: Modification of trans-operative changes in blood fluidity by  
24 hydroxy-chloroquine. A possible explanation for the drugs anti-thrombotic effect.  
25  
26  
27  
28  
29  
30  
31 38. Carter AE, Eban R, Perrett RD. Prevention of post-operative deep venous thrombosis and  
32 pulmonary embolism. *Br Med J* 1971;1:312–314.  
33  
34  
35  
36 39. Espinola RG, PierangeliSS, GharaviAE, HarrisEN,GharaAE. Hydroxychloroquine  
37 reverses platelet activation induced by humanIgG antiphospholipid  
38 antibodies. *ThrombHaemost.*2002;87(3):518–22.  
39  
40  
41  
42  
43  
44 40. Rand JH,Wu XX, Quinn AS, Chen PP, Hathcock JJ, Taatjes D J.Hydroxychloroquine  
45 directly reduces the binding of antiphospholipid antibody-beta2-glycoprotein I complexes to  
46 phospholipid bilayers. *Blood* 2008;112(5):1687–95.  
47  
48  
49  
50  
51 41. Gerstein HC, Thorpe KE, Taylor DW, Haynes RB.The effectiveness of  
52 hydroxychloroquine in patients with type 2 diabetes mellitus who are refractory to  
53 sulfonylureas--a randomized trial. *Diabetes Res Clin Pract.* 2002 Mar;55(3):209-19.  
54  
55  
56  
57  
58  
59  
60

- 1  
2  
3 42. Petri M, Lakatta C, Magder L, Goldman D. Effect of prednisone and hydroxychloroquine  
4 on coronary artery disease risk factors in systemic lupus erythematosus: a longitudinal data  
5 analysis. *Am J Med* 1994;96(3):254–9.  
6  
7  
8  
9  
10 43. Virdis A et al. Early treatment with hydroxychloroquine prevents the development of  
11 endothelial dysfunction in a murine model of systemic lupus erythematosus. *Arthritis Res*  
12 *Ther.* 2015 Oct 6;17:277.  
13  
14  
15  
16  
17 44. Le NT, Takei Y, Izawa-Ishizawa Y, Heo KS, Lee H, Smrcka AV, Miller BL, Ko KA,  
18 Ture S, Morrell C, Fujiwara K, Akaike M, Abe J. Identification of activators of ERK5  
19 transcriptional activity by high-throughput screening and the role of endothelial ERK5 in  
20 vasoprotective effects induced by statins and antimalarial agents. *J Immunol.* 2014 Oct  
21 1;193(7):3803-15.  
22  
23  
24  
25  
26  
27  
28  
29 45. Lafyatis R, York M, Marshak-Rothstein A: Antimalarial agents: closing the gate on Toll-  
30 like receptors? *Arthritis Rheum* 2006; 54:3068–3070.  
31  
32  
33  
34 46. Kyburz D, Brentano F, Gay S: Mode of action of hydroxychloroquine in RA—evidence of  
35 an inhibitory effect on Tolllike receptor signaling. *Nat Clin Pract Rheumatol* 2006; 2:458–  
36  
37  
38  
39 459.  
40  
41  
42 47. Kuznik A, Bencina M, Svajger U, Jeras M, Rozman B, Jerala R. Mechanism of  
43 endosomal TLR inhibition by antimalarial drugs and imidazoquinolines. *J Immunol.*  
44 2011;186(8):4794-804.  
45  
46  
47  
48  
49 48. Bygbjerg IC, Svenson M, Theander TG, Bendtzen K: Effect of antimalarial drugs on  
50 stimulation and interleukin 2 production of human lymphocytes. *Int J Immunopharmacol*  
51 1987; 9:513–519.  
52  
53  
54  
55  
56  
57  
58  
59  
60

- 1  
2  
3 49. van den Borne BE, Dijkmans BA, de Rooij HH, et al.: Chloroquine and  
4 hydroxychloroquine equally affect tumor necrosis factor-alpha, interleukin 6, and interferon-  
5 gamma production by peripheral blood mononuclear cells. *J Rheumatol* 1997; 24:55–60.  
6  
7  
8  
9  
10 50. Weber SM, Levitz SM: Chloroquine interferes with lipopolysaccharide-induced TNF-  
11 alpha gene expression by a non lysosomotropic mechanism. *J Immunol* 2000; 165:1534–  
12 1540.  
13  
14  
15  
16  
17 51. van den Borne BE, Dijkmans BA, de Rooij HH, et al.: Chloroquine and  
18 hydroxychloroquine equally affect tumor necrosis factor-alpha, interleukin 6, and interferon-  
19 gamma production by peripheral blood mononuclear cells. *J Rheumatol* 1997; 24:55–60.  
20  
21  
22  
23  
24 52. Broder A, Putterman C. Hydroxychloroquine use is associated with lower odds of  
25 persistently positive antiphospholipid antibodies and/or lupus anticoagulant in systemic lupus  
26 erythematosus. *J Rheumatol*. 2013;40(1):30-3.  
27  
28  
29  
30  
31 53. Raschi E, Borghi MO, Grossi C, et al.: Toll-like receptors: another player in the  
32 pathogenesis of the anti-phospholipid syndrome. *Lupus* 2008; 17:937–942.  
33  
34  
35  
36  
37 54. Doring Y, Hurst J, Lorenz M, et al.: Human antiphospholipid antibodies induce TNF  
38 alpha in monocytes via Toll-like receptor 8. *Immunobiology* 2010; 215:230–241.  
39  
40  
41  
42 55. Berman J, Girardi G, Salmon JE: TNF-alpha is a critical effector and a target for therapy  
43 in antiphospholipid antibody-induced pregnancy loss. *J Immunol* 2005; 174:485–490.  
44  
45  
46  
47 56. Kaplan YC, Ozsarfati J, Nickel C, Koren G. Reproductive outcomes following  
48 hydroxychloroquine use for autoimmune diseases: a systematic review and meta-analysis. *Br*  
49 *J Clin Pharmacol*. 2016 May;81(5):835-48.  
50  
51  
52  
53  
54  
55  
56  
57  
58  
59  
60

- 1  
2  
3  
4  
5  
6  
7  
8  
9 57. Götestam Skorpen C, Hoeltzenbein M, Tincani A, Fischer-Betz R, Elefant E, Chambers  
10 C, da Silva J, Nelson-Piercy C, Cetin I, Costedoat-Chalumeau N, Dolhain R, Förger F,  
11 Khamashta M, Ruiz-Irastorza G, Zink A, Vencovsky J, Cutolo M, Caeyers N, Zumbühl C,  
12 Østensen M. The EULAR points to consider for use of antirheumatic drugs before pregnancy,  
13 and during pregnancy and lactation. *Ann Rheum Dis*. 2016 May;75(5):795-810.  
14  
15  
16  
17  
18  
19  
20 58. Tarfaoui N, Autret-Leca E, Mazjoub S, Cissoko H and Jonville-Béra AP.  
21 Hydroxychloroquine During Pregnancy: a Review of Retinal Toxicity in the Newborns.  
22 *Thérapie* 2013; 68 (1): 43–47  
23  
24  
25  
26  
27 59. Brigham SA, Conlon C, Farquharson RG. A longitudinal study of pregnancy outcome  
28 following idiopathic recurrent miscarriage. *Hum Reprod*. 1999;14(11):2868-2871.  
29  
30  
31  
32  
33 60. The efficacy of hydroxychloroquine for obstetrical outcome in anti-phospholipid  
34 syndrome: Data from a European multicenter retrospective study. *Autoimmunity* 2015.  
35  
36  
37  
38  
39  
40  
41  
42  
43  
44  
45  
46  
47  
48  
49  
50  
51  
52  
53  
54  
55  
56  
57  
58  
59  
60

# BMJ Open

**Hydroxychloroquine for Prevention of Recurrent  
Miscarriage:  
Study Protocol for a Multicenter Randomized Placebo  
Controlled Trial  
BaBy hydroxychloroQuine (BBQ) study**

|                                 |                                                                                                                                                                                                                                                                                                                                                                                                                                                                                                                                                                                                                                                                                                                                                                                                                                                               |
|---------------------------------|---------------------------------------------------------------------------------------------------------------------------------------------------------------------------------------------------------------------------------------------------------------------------------------------------------------------------------------------------------------------------------------------------------------------------------------------------------------------------------------------------------------------------------------------------------------------------------------------------------------------------------------------------------------------------------------------------------------------------------------------------------------------------------------------------------------------------------------------------------------|
| Journal:                        | <i>BMJ Open</i>                                                                                                                                                                                                                                                                                                                                                                                                                                                                                                                                                                                                                                                                                                                                                                                                                                               |
| Manuscript ID                   | bmjopen-2018-025649.R2                                                                                                                                                                                                                                                                                                                                                                                                                                                                                                                                                                                                                                                                                                                                                                                                                                        |
| Article Type:                   | Protocol                                                                                                                                                                                                                                                                                                                                                                                                                                                                                                                                                                                                                                                                                                                                                                                                                                                      |
| Date Submitted by the Author:   | 11-Feb-2019                                                                                                                                                                                                                                                                                                                                                                                                                                                                                                                                                                                                                                                                                                                                                                                                                                                   |
| Complete List of Authors:       | Pasquier, Elisabeth; Brest Univ Hosp, EA 3878 de Saint-martin, Luc; EA 3878 Groupe d'Etude de la Thrombose de Bretagne Occidentale<br>marhic, Gisèle; Centre d'Investigation Clinique-INSERM 1412<br>Chauleur, Celine; University Hospital Bellevue, Thrombosis Research Group<br>Bohec, Caroline; Hôpital François Mitterrand, Division of Gynaecology<br>Bretelle, Florence; Université de la Méditerranée, Hôpital Nord, Division of Gynaecology<br>Lejeune-Saada, Véronique; Hôpital d'Auch, Division of Gynaecology<br>Hannigsberg, Jacob; Brest university hospital, division of gynecology<br>Plu-bureau, Geneviève; APHP, hôpital Cochin, Division of Gynaecology<br>Cogulet, Virginie; Brest university hospital, Pharmacy<br>Merviel, Philippe; Brest university hospital, Division of Gynaecology<br>Mottier, Dominique; Brest university Hospital |
| <b>Primary Subject Heading</b>: | Obstetrics and gynaecology                                                                                                                                                                                                                                                                                                                                                                                                                                                                                                                                                                                                                                                                                                                                                                                                                                    |
| Secondary Subject Heading:      | Medical management                                                                                                                                                                                                                                                                                                                                                                                                                                                                                                                                                                                                                                                                                                                                                                                                                                            |
| Keywords:                       | Subfertility < GYNAECOLOGY, INTERNAL MEDICINE, Clinical trials < THERAPEUTICS                                                                                                                                                                                                                                                                                                                                                                                                                                                                                                                                                                                                                                                                                                                                                                                 |
|                                 |                                                                                                                                                                                                                                                                                                                                                                                                                                                                                                                                                                                                                                                                                                                                                                                                                                                               |

SCHOLARONE™  
Manuscripts



1  
2  
3 1 Hydroxychloroquine for Prevention of Recurrent Miscarriage:  
4  
5  
6  
7 2 Study Protocol for a Multicenter Randomized Placebo Controlled Trial  
8  
9  
10 3 **BaBy** hydroxychloroQuine (BBQ) study  
11  
12  
13  
14 4

15  
16 5 Elisabeth Pasquier,<sup>1</sup> Luc de Saint Martin,<sup>1</sup> Gisèle Marhic,<sup>2</sup> Céline Chauleur,<sup>3</sup> Caroline  
17 6 Bohec,<sup>4</sup> Florence Bretelle,<sup>5</sup> Véronique Lejeune-Saada,<sup>6</sup> Jacob Hannigsberg,<sup>7</sup> Geneviève Plu-  
18 7 Bureau,<sup>8</sup> Virginie Cogulet,<sup>9</sup> Philippe Merviel,<sup>7</sup> Dominique Mottier,<sup>10</sup>  
19  
20  
21 8

22  
23 9 **Author affiliations :**

24  
25 10 <sup>1</sup>EA 3878 Groupe d'Etude de la Thrombose de Bretagne Occidentale, Department of Internal  
26 11 Medicine and Chest Diseases, Brest University Hospital, Hôpital LaCavale Blanche, Brest,  
27 12 France  
28  
29

30 13 <sup>2</sup>Centre d'Investigation Clinique-INSERM 1412, Hôpital La Cavale Blanche, Brest, France  
31

32 14 <sup>3</sup>Division of Gynaecology, Saint Etienne University Hospital, Saint Etienne, France  
33

34 15 <sup>4</sup>Division of Gynaecology, Hôpital François Mitterand, Pau, France  
35

36 16 <sup>5</sup>Division of Gynaecology, Université de la Méditerranée, Hôpital Nord, Marseille, France  
37

38 17 <sup>6</sup>Division of Gynaecology, Hôpital d'Auch, Auch, France  
39

40 18 <sup>7</sup>Division of Gynaecology, Brest University Hospital, Hôpital Morvan, Brest, France  
41

42 19 <sup>8</sup>Division of Gynaecology, APHP, hôpital Cochin, Paris, France  
43  
44

45 20 <sup>9</sup> Central pharmacy, Brest University Hospital, Brest, France  
46

47 21 <sup>10</sup>EA 3878 Groupe d'Etude de la Thrombose de Bretagne Occidentale, La Cavale Blanche  
48 22 Hospital, Brest, France  
49  
50

51 23

52 24

53  
54  
55 25 **Corresponding author** E-mail: Elisabeth.pasquier@chu-brest.fr  
56  
57  
58  
59  
60

## 26 ABSTRACT

27 **Introduction** Recurrent miscarriage (RM), defined by  $\geq 3$  consecutive losses during the first  
28 trimester of pregnancy, affects 1 to 2% of fertile couples. Standard investigations fail to reveal  
29 any apparent cause in  $\sim 50\%$  of couples. However, on the basis of animal models and clinical  
30 studies, several hypotheses have been put forward concerning underlying mechanisms of RM:  
31 altered ovarian reserve, progesterone defect, thrombotic and/or endothelial dysfunction,  
32 immunological disturbances. Nonetheless, no study has yet reached conclusive beneficial  
33 clinical evidence for a potential treatment in unexplained RM. Hydroxychloroquine (HCQ) is  
34 a molecule with extensive safety data during pregnancy. HCQ pharmacological properties  
35 (e.g. anti-thrombotic, vascular protective, immunomodulatory, improved glucose tolerance,  
36 lipidlowering, antiinfectious) could be effective against some mechanisms of unexplained  
37 RM. Furthermore, eventhough clinical benefit of HCQ is suggested in prevention of  
38 thrombotic and late obstetric events in antiphospholipid (APL) syndrome, there is no data  
39 suggesting the benefit of HCQ in RM in the presence of APL antibodies.

40 **Methods and analysis** Taken all together and given the low cost of HCQ, the aim of this  
41 multicenter, randomized placebo-controlled, double-blind study is to investigate whether  
42 HCQ would improve the live-birth rate in women with RM, irrespective of maternal  
43 thrombophilic status: i) no known thrombophilia, ii) inherited thrombophilia or iii) APL  
44 antibodies. The primary end-point is a live and viable birth. After confirming eligibility and  
45 obtaining consent, 300 non-pregnant women will be randomized in 2 parallel groups for a  
46 daily oral treatment (HCQ 400 mg or placebo), initiated before conception and stopped at 10  
47 weeks' gestation. If pregnancy doesn't occur after one year, the treatment will be stopped.

1  
2  
3 48 **Ethics and dissemination** Agreement from the French National Public Health and Drug  
4  
5 49 Security Agency (160765A-22) and ethical approval from the Committee for the Protection of  
6  
7 50 Persons of NORD-OUEST I (2016-001330-97) have been obtained.  
8  
9

10  
11 51 **Trial registration number** ClinicalTrials.gov: NCT0316513  
12  
13

14 52  
15  
16  
17  
18  
19  
20  
21  
22  
23  
24  
25  
26  
27  
28  
29  
30  
31  
32  
33  
34  
35  
36  
37  
38  
39  
40  
41  
42  
43  
44  
45  
46  
47  
48  
49  
50  
51  
52  
53  
54  
55  
56  
57  
58  
59  
60

For peer review only

## 53 STRENGTHS AND LIMITATIONS OF THIS STUDY

- 54 ➤ Despite numerous fundamental research publications and clinical trials, the only  
55 recommendation that applies to follow-up of child bearing women suffering from RM  
56 relies on cocooning.
- 57 ➤ This is the first randomized placebo-controlled study which aims to investigate  
58 whether oral hydroxychloroquine would improve the live-birth rate in women with  
59 recurrent miscarriage irrespective of maternal thrombophilic status.
- 60 ➤ As a possible limitation, this study is based on the hypothesis that recurrent  
61 miscarriage often results from combined failures which could benefit from the  
62 pleiotropic effects of hydroxychloroquine.
- 63 ➤ As hydroxychloroquine should probably be administered at least 2 menstrual cycles  
64 before conception to have an effect, women will be advised not to get pregnant during  
65 this period, but we do not plan to exclude those who will conceive too early.

66

## 67 INTRODUCTION

### 68 **Background**

69 RM is a common public health reproductive burden causing both physical and emotional  
70 distress. To date there is no treatment whose benefit has been clearly proved, even in the  
71 presence of well-known risk factors of RM. Most importantly, the absence of benefit has been  
72 clearly demonstrated for some treatments that are yet empirically proposed.

#### 74 *Unexplained Recurrent Miscarriage (RM)*

75 A sporadic miscarriage is clinically detected in approximately 10% to 15% of pregnancies.  
76 Fetal development usually stops before 10 weeks.<sup>1</sup>Given the recurrent miscarriage (RM)  
77 frequency among fertile couples (1% to 2%) being significantly higher than the expected  
78 random one ( $15 \times 15 \times 15\% = 0.34\%$ ), RM is most often defined as  $\geq 3$  consecutive losses.  
79 Apart from the detection of a lethal chromosomal abnormality on products of conception, the  
80 underlying mechanism of loss remains unknown in most cases. The rate of normal embryonic  
81 karyotypes in RM steadily increases from the third loss, suggesting alternative mechanisms  
82 than meiotic aberrations.<sup>2</sup>Standard investigations fail to reveal any apparent cause in ~50% of  
83 the women. However, On the basis of animal models and clinical studies, several hypotheses  
84 have been put forward. Here, we focus on thrombosis and both endothelial and immune  
85 dysfunctions. Those could be targeted by pharmacological properties of hydroxychloroquine  
86 (HCQ).

87 An association with some inherited thrombophilia has been reported (factor V Leiden,  
88 mutation G20210A of the prothrombin and protein S deficiency), although the odds ratio were  
89 most often  $\leq 2$ .<sup>3</sup> Animal models have demonstrated that some actors of the haemostatic

1  
2  
3 90 system may participate in normal implantation and placental development regardless of the  
4  
5 91 coagulation process.<sup>4,5</sup> In humans, a basal prothrombotic state outside of pregnancy has been  
6  
7 92 measured in women with previous RM and without known thrombophilia.<sup>6-8</sup>This relative  
8  
9 93 prothrombotic state, measured at distance of any obstetrical event, could reflect chronic  
10  
11 94 endothelium damage in those women.<sup>9,10</sup>Notwithstanding, the clinical trials that have assessed  
12  
13 95 antithrombotic treatments (aspirin initiated before or after conception, eventually combined  
14  
15 96 with LMWH, or LMWH alone initiated after pregnancy diagnosis) did not show any benefit  
16  
17 97 in prevention of further loss.<sup>11-14</sup>Likewise, no benefit of LMWH has been shown in the  
18  
19 98 subgroup of women with inherited thrombophilia (TIPPS study).<sup>15</sup>However, we emphasize  
20  
21 99 that the subcutaneous route of LMWH administration does not allow assessing this treatment  
22  
23 100 at the critical time of implantation onset in fertile women. Indeed, the injections cannot be  
24  
25 101 routinely initiated before 5 weeks' gestation.

26  
27  
28  
29  
30  
31 102 Regarding immune dysfunction, apart from the detection of many auto-antibodies  
32  
33 103 (antiphospholipid, anti-thyroid),<sup>16</sup> attention is now focused on natural killer cells, whose  
34  
35 104 temporal and spatial distribution in the uterine mucosa suggests that they contribute to control  
36  
37 105 trophoblast invasion and cytokine response at the maternal-fetal interface (balances Th-1 / Th-  
38  
39 106 2 and Th-17 / T-reg). Th-2 and T-reg preponderance in normal pregnancy shifts to Th-1 and  
40  
41 107 Th-17 predominance in RM.<sup>17,18</sup> Otherwise, an overexpression of TOLL receptors in decidua  
42  
43 108 was observed in women with RM, especially TLR4 and TLR9 receptors.<sup>19</sup>  
44  
45 109 Immunomodulatory treatments have therefore been proposed and assessed without conclusive  
46  
47 110 results (paternal leukocyte immunization,<sup>20</sup> intravenous immunoglobulins,<sup>21</sup> Small doses of  
48  
49 111 corticosteroids.)<sup>22</sup>

50  
51  
52  
53  
54  
55 112 Despite numerous fundamental research publications and clinical trials, the only current  
56  
57 113 recommendation for follow-up of child bearing women suffering from unexplained RM relies  
58  
59 114 on cocooning.<sup>17,23</sup>

1  
2  
3 115  
4  
56 116 ***RM in the presence of antiphospholipid (APL) antibodies***  
7  
8

9 117 Antiphospholipid syndrome (APS) is diagnosed in the presence of persistent, above the 99th  
10 118 percentile, APL levels and of at least one clinical manifestation (obstetrical, arterial or venous  
11 119 thrombosis). «Three or more unexplained consecutive spontaneous abortions before the 10th  
12 120 week of gestation, with maternal anatomic or hormonal abnormalities and paternal and  
13 121 maternal chromosomal causes excluded »<sup>24</sup> delineates one of the possible manifestation of  
14 122 APS. Even though RM is one accepted clinical manifestation of APS, its specificity is low, as  
15 123 compared to the occurrence of fetal death after 10 weeks of amenorrhea.<sup>24</sup> The benefit of low  
16 124 dose aspirin and/or LMWH or heparins for secondary prevention of RM has not been  
17 125 demonstrated in women who present with APL antibodies and no other clinical manifestation  
18 126 of APS.<sup>25</sup> The HEPASA study found no benefit of combination therapy of LMWH and low  
19 127 dose aspirin in women who presented with APL, without arterial or venous thrombosis  
20 128 history, and who had at least two fetal losses before 32 weeks of amenorrhea.<sup>25</sup> As a  
21 129 consequence, no clinical evidence has been drawn for an optimal management of these  
22 130 women.

23  
24  
25  
26  
27  
28  
29  
30  
31  
32  
33  
34  
35  
36  
37  
38  
39  
40  
41  
42 131  
43  
4445 132 ***Rationale for hydroxychloroquine (HCQ)***  
46  
47

48 133 Chloroquine and HCQ are used for centuries to treat malaria. Because of a more favorable  
49 134 usage profile and immunomodulatory properties, HCQ use became common for treatment of  
50 135 autoimmune and inflammatory diseases. Other therapeutic properties of HCQ have since been  
51 136 discovered, or rather rediscovered, and assessed in a more consistent manner. The following  
52 137 HCQ properties could be effective against mechanisms of RM.

1  
2  
3 138 Since 30 years, benefit of HCQ to prevent venous thromboembolism (VTE) has been  
4  
5 139 suspected<sup>26-35</sup> i) among patients with SLE<sup>26,31</sup> and ii) among all-comer patients, free of  
6  
7 140 autoimmune disease, after orthopedic surgery.<sup>27-30</sup> Thus, before the use of LMWH, HCQ was  
8  
9 141 assessed in the 1970s in the prevention of VTE events after orthopedic surgery. The results of  
10  
11 142 randomized trials,<sup>28-30</sup> (around 10 000 patients included) led to the conclusion that HCQ was  
12  
13 143 beneficial in preventing VTE after orthopedic surgery.<sup>28</sup> In patients with SLE, in the presence  
14  
15 144 or absence of APL antibodies, studies have suggested the benefit of HCQ for the primary  
16  
17 145 prevention of both arterial and venous thrombotic events.<sup>26,31-33</sup> In primary APS, HCQ  
18  
19 146 reduced the thrombus size after vessel injury in mice<sup>34</sup> and would improve the secondary  
20  
21 147 prevention of VTE in humans, in comparison to oral anticoagulants used alone.<sup>35</sup> The  
22  
23 148 antithrombotic action of HCQ would be inherent to some biological effects (in the absence<sup>36-</sup>  
24  
25 149 <sup>38</sup>or in the presence<sup>39-40</sup> of APL antibodies). Otherwise, much data support an endothelium  
26  
27 150 protective action of HCQ via anti-diabetic,<sup>41</sup> lipid lowering,<sup>42</sup> anti-oxidant<sup>43</sup> effects or a direct  
28  
29 151 endothelial protection, via ERK5 protein kinase activation.<sup>44</sup>

30  
31  
32  
33  
34  
35 152 Regarding immunomodulation, HCQ has an impact on the innate immunity by  
36  
37 153 inhibition of the activation of some Toll receptors (3,7,9).<sup>45-47</sup> HCQ decreases the circulating  
38  
39 154 levels of interleukin 1, 2,<sup>48</sup> 6,<sup>49</sup> TNF<sup>49,50</sup> and, interferon- $\gamma$ ,<sup>49</sup> promoting the TH2 processes  
40  
41 155 that prevail in a "normal pregnancy". Otherwise, HCQ decreases APL plasma levels<sup>51</sup> and  
42  
43 156 interferes with both endothelial cell activation and TNF- $\alpha$  production, 2 major key pathways  
44  
45 157 involved in APS.<sup>52-54</sup>

46  
47  
48  
49 158 We also outline the well-known anti-infectious action of HCQ which originates from  
50  
51 159 the alkalization of intracellular acidic vesicles and might inhibit the growth of intracellular  
52  
53 160 microorganisms. This could act against chronic endometritis, additional mechanism suspected  
54  
55 161 in RM.



1  
2  
3 162 Remarkably, the use of HCQ (and closely related molecules) as anti-malarial or in auto-  
4  
5 163 immune diseases during pregnancy<sup>55-57</sup> and lactation<sup>56</sup> have provided extensive safety data  
6  
7 164 during pregnancy and even during breast-feeding.  
8  
9

10  
11 165 Otherwise, oral administration of HCQ facilitates its prescription early, before conception,  
12  
13 166 thus enabling fetal exposure from the very beginning of time period at risk for activation of  
14  
15 167 RM underlying mechanisms. Noteworthy, HCQ has never been evaluated in the indication of  
16  
17 168 RM with or without APL antibodies.  
18  
19

20  
21 169 Taken all together and given that RM is a stereotyped clinical entity whatever the maternal  
22  
23 170 thrombophilic status, we aimed at evaluating the role of HCQ in prevention of RM, with or  
24  
25 171 without APL antibodies or inherited thrombophilia. We therefore initiated a multicenter  
26  
27 172 placebo-controlled trial sponsored by Brest University hospital and supported by a grant from  
28  
29 173 the French Ministry of Health (PHRCN-17-0573).  
30  
31  
32  
33  
34  
35  
36  
37  
38  
39  
40  
41  
42  
43  
44  
45  
46  
47  
48  
49  
50  
51  
52  
53  
54  
55  
56  
57  
58  
59  
60

## 174 **STUDY OBJECTIVES**

### 175 *Primary objective*

176 The aim of this placebo-controlled, double-blind trial is to investigate whether HCQ (orally  
177 administrated before conception until 10 weeks of gestational age) would improve the live-  
178 birth rate of 15% or more, in women with previous RM, irrespective of their biological  
179 thrombophilic status.

180

### 181 *Secondary objectives*

182 We aim to investigate whether:

- 183 ➤ HCQ effect would be different among women with inherited thrombophilia  
184 or APL antibodies
- 185 ➤ HCQ would have an impact on the occurrence of some pregnancy events  
186 (early miscarriage, intrauterine fetal death, placental vascular disease)
- 187 ➤ The impact of HCQ would be different in subgroups of women at higher or  
188 lower risk of recurrence according to the number of previous miscarriages  
189 (= 3 ou > 3), the maternal age ( $\geq 35$  ou  $< 35$  ans), the parity: previous live-  
190 birth, a previous late fetal death after 10 weeks' gestation.

191 We aim to confirm that HCQ has no negative impact on the chance of getting  
192 pregnant, the newborn (gestational age, birth weight, survival at 28 days, congenital  
193 abnormalities), the child at 6 months.

194

## 195 **METHODS**

1  
2  
3 196 ***Study design***  
4  
5

6 197 This is a prospective, randomized 1:1 placebo-controlled, double-blind, and French multi-  
7  
8 198 centre trial of phase III (, with 2 parallel-groups (HCQ 400 mg or placebo). At randomization,  
9  
10 199 the minimization method will be used to balance between the 2 groups and 2 main  
11  
12 200 determinants of miscarriage recurrence: maternal age ( $\leq 35$  or  $>35$  years) and number of  
13  
14 201 previous losses (3 or  $\geq 4$ ).  
15  
16  
17  
18  
19 202

20  
21 203 ***Study setting***  
22  
23  
24

25 204 Women are currently being enrolled in university hospitals (gynecology units: Besançon,  
26  
27 205 Brest, Clermont Ferrand, Lille, Marseille, Nantes, Paris Cochin, Paris Bichat, Rennes, Saint-  
28  
29 206 Etienne; internal medicine units: Brest, Paris Saint-Antoine) or in general hospitals  
30  
31 207 (gynecology units: Auch, Quimper, Mont de Marsan, Pau).  
32  
33  
34  
35 208

36  
37  
38 209 ***Population***  
39  
40

41 210 The study population consists of women trying to conceive and who had experienced at least  
42  
43 211 3 consecutive miscarriages at the first trimester of pregnancy (normal parental karyotypes, no  
44  
45 212 uterine cavity abnormality that might explain the losses). Through medical meetings, emails  
46  
47 213 and letters, all obstetricians and internal medicine practitioners working in each participating  
48  
49 214 centre's catchment area have been informed and trained on BBQ study. All of those are asked  
50  
51 215 to refer potentially eligible women to the unit participating in the study for screening. In each  
52  
53 216 centre, patient recruitment is ensured by already in place settings such as specific RM  
54  
55 217 consultations or other OBS/GYN patient management units. In addition to this recruitment  
56  
57  
58  
59  
60

1  
2  
3 218 approach, poster information in consultation waiting rooms is being used to reach-out to more  
4  
5 219 patients.  
6  
7

8 220 At the inclusion visit, the medical investigator checks inclusion and exclusion criteria of  
9  
10 221 eligible women.  
11  
12

13  
14 222

15  
16  
17 223 ***Inclusion criteria***

18  
19  
20 224 ➤ Women aged between 18 and 37 inclusive,

21  
22 225 ➤ Women trying to conceive,

23  
24 226 ➤ Women with at least 3 previous consecutive miscarriages in the first pregnancy  
25  
26 227 trimester, of unknown origin defined as:

27  
28  
29 228 • Normal parental karyotypes,

30  
31 229 • No uterine cavity abnormality that might explain RM (ultrasound scan,  
32  
33 230 hysteroscopy or hystero-graphy),

34  
35 231 • In case of persistent positive APL antibodies according to the biological  
36  
37 232 criteria of Myakis:<sup>24</sup>no previous thrombotic or obstetrical event defined in  
38  
39 233 APS<sup>24</sup>, except for RM in the first trimester of pregnancy, .

40  
41 234 ➤ Women who have given their informed consent.  
42  
43  
44  
45

46 235

47  
48  
49 236 ***Exclusion criteria***

50  
51  
52 237 ➤ Ongoing pregnancy,

53  
54 238 ➤ Normal pregnancy (live and viable birth) since the last miscarriage,

55  
56 239 ➤ Abnormal parental karyotype,

57  
58 240 ➤ Uterine cavity abnormality that might explain RM in the first trimester of pregnancy,  
59  
60

- 1  
2  
3 241 ➤ Antiphospholipid Syndrome defined as both:  
4  
5 242 • persistent positive APL antibodies: lupus anticoagulant and/or APL  
6  
7 243 (anticardiolipin or anti béta2 GPI, IgG or IgM) titers > 99th percentile or >40  
8  
9 244 with at least 12 weeks interval between two positive determinations (persistent  
10  
11 245 antibodies) AND,  
12  
13  
14 246 • a specific clinical setting of APS (thrombotic or obstetrical, apart from RM in  
15  
16 247 the first trimester of pregnancy) according to Myakis criteria.<sup>24</sup>  
17  
18  
19 248 ➤ Known contraindication to a treatment by HCQ (retinopathy, hypersensitivity to  
20  
21 249 chloroquine or HCQ, G6PD deficiency, acute intermittent porphyria, chronic liver or  
22  
23 250 kidney insufficiency, extensive cutaneous psoriasis not controlled by local treatment,  
24  
25 251 significant chronic digestive or hematologic disease) or known rare disorder of lactose  
26  
27 252 metabolism (excipient),  
28  
29  
30 253 ➤ Past history of epilepsia or psychotic disorders,  
31  
32  
33 254 ➤ Indication to a treatment by HCQ according to the MA (rheumatoid arthritis, Lupus,  
34  
35 255 solar eczema),  
36  
37 256 ➤ Previous exposure >4 years to chloroquine or HCQ,  
38  
39  
40 257 ➤ Previous inclusion in this study,  
41  
42  
43 258 ➤ Woman unable to consent, protected under the terms of the law, or woman deprived of  
44  
45 259 liberty by judicial or administrative decision,  
46  
47 260 ➤ non affiliation to the social security system,  
48  
49 261 ➤ Impossible follow-up.  
50  
51  
52  
53 262  
54  
55  
56 263 ***Allocation, randomization and blinding***  
57  
58  
59  
60

1  
2  
3 264 After inclusion and obtaining written consent, an identification number is assigned to the  
4  
5 265 patient through a secure server providing access to electronic case report forms generated by  
6  
7 266 the CIC Brest (via the "Capture System" software). The randomization is done using the  
8  
9 267 "Capture System" software with implementation of a randomization with minimization to  
10  
11 268 balance between the 2 treatment groups according to the main determinants of miscarriage  
12  
13 269 recurrence: age ( $\leq 35$  or  $>35$  years) and number of miscarriages (3 or  $\geq 4$ ).

14  
15  
16  
17 270 The patient, the investigator and all medical and paramedic professionals taking care of the  
18  
19 271 patient will be blinded to the treatment group. The packaging of placebo and HCQ will be  
20  
21 272 provided in the form of capsules with identical external shape and packaging. Information on  
22  
23 273 the correspondence between treatment group and the patient number will be held by both the  
24  
25 274 central pharmacy of Brest CHRU and the Data Management Unit.

26  
27  
28  
29  
30 275

### 31 32 33 276 ***Intervention***

34  
35  
36 277 Included patients are assigned to receive either 400 mg of oral HCQ per day, administered in  
37  
38 278 2 divided doses of 200 mg or 2 daily doses of oral placebo. Thus, treatment is initiated before  
39  
40 279 conception and stopped at 10 weeks' gestation (weeks of amenorrhea) or after one year of  
41  
42 280 treatment in the absence of pregnancy.

43  
44  
45  
46 281

### 47 48 49 282 ***Rationale for choosing oral 400 mg daily HCQ***

50  
51  
52 283 It is the usual route of administration and dose for indications specified by the Marketing  
53  
54 284 authorization (MA). This choice of dose comes from the evaluation of the risk-benefit balance  
55  
56 285 in the MA indications and, over all, from the fact that data of good tolerance have been  
57  
58 286 compiled to this (usual) dosage in literature. Otherwise, in most cases, fetal development

1  
2  
3 287 stops before 10 weeks of amenorrhea. Treatment exposure is essential from the very  
4  
5 288 beginning of implantation, a developmental stage that can potentially be disturbed by the  
6  
7 289 mechanisms responsible for miscarriage. The oral administration allows starting the treatment  
8  
9 290 before conception. This drug has a long half-life (from 30 to 60 days). Its full effect is  
10  
11 291 obtained only after certain duration of exposure. That is why its administration is required  
12  
13 292 before conception and its discontinuation after 10 weeks of amenorrhea, i.e. before the end of  
14  
15 293 the first trimester of pregnancy which is at the highest risk for RM.  
16  
17  
18  
19  
20  
21  
22

### 23 295 ***Treatments frequently given in combination***

- 26 296 ➤ Folic acid and other vitamin supplements,
- 27  
28 297 ➤ Aspirin at low dose, which could be given by some investigators to prevent the  
29  
30 298 recurrence of vasculo-placental disease (preeclampsia, intra-utero growth restriction)  
31  
32 299 or as part of a primary prevention of vasculo-placental events in women with high  
33  
34 300 levels of persistent APL antibodies.  
35  
36  
37  
38  
39  
40  
41

### 42 302 ***Study plan and procedures***

43  
44  
45 303 Before pregnancy, women are monthly contacted by phone. The non pregnant women are  
46  
47 304 systematically seen in consultation after 6 and 12 months of treatment. In the absence of  
48  
49 305 pregnancy after one year, the treatment will be withdrawn and patients will be contacted by  
50  
51 306 phone at 14 months and 18 months (End-of-Study visit).  
52  
53  
54

55 307 During pregnancy, women are monthly seen in consultation (4 first months) or contacted by  
56  
57 308 phone. The treatment is withdrawn at 10 weeks' gestation or earlier in case of pregnancy loss.  
58  
59  
60

1  
2  
3 309 After delivery, the women are seen in consultation at ~2 months, and contacted by phone at 6  
4  
5 310 months (End-of-Study visit).  
6  
7

8 311 Four tubes of 2.7 ml with sodium citrate and 4 tubes SST of 5 ml (for plasma and serum bank,  
9  
10 312 respectively) are collected at both the inclusion visit and the visit of pregnancy onset or the  
11  
12 313 visit planned after one year of treatment in the absence of pregnancy. Additionally 2 tubes  
13  
14 314 EDTA of 5 ml are collected for DNA bank at inclusion. The biological collection of plasma is  
15  
16 315 carried out within 3 hours after receipt of tubes. DNA extraction is carried out within one  
17  
18 316 week of collection (and at the latest within a month if the sample is frozen at -80 ° C pending  
19  
20 317 extraction). Those specimens are designed to identify prognostic factors (including  
21  
22 318 thrombophilic work-up) for efficacy of the study treatment.  
23  
24  
25  
26  
27  
28 319  
29  
30

### 31 320 ***End points***

32  
33  
34 321 The primary end point is a live and viable birth.  
35  
36

37 322 The secondary end points are:  
38  
39

- 40 323 ➤ A live and viable birth, for the subgroup analyses,  
41  
42 324 ➤ The occurrence of miscarriage, in-utero fetal death, placental vascular disease,  
43  
44 325 premature delivery,  
45  
46 326 ➤ Gestational age at miscarriage,  
47  
48 327 ➤ Concerning the child: gestational age and weight at birth, survival at 28 days,  
49  
50 328 safety data at 6 months of life, congenital abnormality.  
51  
52  
53  
54

55 329  
56  
57

### 58 330 ***Safety considerations, safety monitoring and AE reporting***

59  
60



1  
2  
3 331 Apart from, adverse events (AE) and serious adverse events (SAE), some safety parameters  
4  
5 332 will be systematically recovered: CBC, visual and neurological symptoms for women and  
6  
7 333 reports of ultrasound and post-natal medical visits for children. Adverse events (AE) are  
8  
9 334 defined as any untoward medical occurrence in a person who consents to biomedical research  
10  
11 335 whether this event is related or not to the research or experimental drug on which this research  
12  
13 336 addresses. The gravity of serious adverse events (SAE) is defined by one of the following  
14  
15 337 findings: death, life-threatening situation, significant or sustained incapacity or disability,  
16  
17 338 hospitalization, prolongation of hospitalization, deformity or birth defect, potentially serious  
18  
19 339 event. Any SAE or event of interest, regardless of its causal relationship with the trial  
20  
21 340 treatment or the research, must be reported to the sponsor, as soon as possible and the latest  
22  
23 341 24 hrs after their occurrence for SAE. The investigator is in charge of noting and reporting all  
24  
25 342 SAE occurring during the study, from the date of the signed informed consent, during the  
26  
27 343 study's expected duration of follow up (6 months after the treatment cessation for women and  
28  
29 344 at age 6 months for newborns). Furthermore, regardless of the event occurrence deadline after  
30  
31 345 the end of the study, all SAE that may be due to the research must be declared to the sponsor  
32  
33 346 when there is no other cause and effect accounted for (such as serious events that may occur  
34  
35 347 long after exposure to the drug, such as cancers or congenital abnormalities).  
36  
37  
38  
39  
40  
41  
42  
43 348 Some AE and SAE are expected and can be linked to i) pregnancy, ii) the disease (occurrence  
44  
45 349 of another miscarriage) or study treatment (benign, adverse reaction AR, as digestive  
46  
47 350 symptoms or severe, serious adverse reaction SAR as skin reaction, which requires to  
48  
49 351 immediately stop the treatment).  
50  
51  
52  
53  
54  
55

56 353 ***Independent Data and safety monitoring Board (IDSMB)***  
57  
58  
59  
60

1  
2  
3 354 The IDSMB comprises 8 members without competing interests, not directly involved in other  
4  
5 355 aspects of the trial and independent from the sponsor: 7 voting members, experts in  
6  
7 356 complementary fields of the pathology and clinical trials (internal medicine, methodology,  
8  
9 357 specialist of teratogenic agents, neonatology, hematology, ophthalmology) and a non-voting  
10  
11 358 independent statistician. IDSMB monitors the data that affects patient safety, provides  
12  
13 359 independent expertise for the evaluation of adverse events (AE) occurring during the study,  
14  
15 360 expresses an opinion concerning the benefit / risk ratio and provides recommendations in  
16  
17 361 order to help the steering committee to take decisions on protocol modification or early  
18  
19 362 termination of the study. The members of the IDSMB will have to meet every 20 inclusions.  
20  
21  
22 363 The IDSMB will transmit its recommendations to the steering Committee, which decides  
23  
24 364 whether or not to stop the study. Given the safety data and the treatment benefit, several  
25  
26 365 different recommendations can be provided by the IDSMB: i) continuation of study without  
27  
28 366 protocol modification, ii) continuation of study with modification of protocol, iii) temporarily  
29  
30 367 discontinuation of inclusions, iiiii) early termination of the study  
31  
32  
33  
34  
35  
36 368 Over the course of study, the IDSMB will have an advisory role in reassessing the benefit/risk  
37  
38 369 ratio of the study.  
39  
40  
41  
42  
43  
44

#### 371 *Number of patients*

45  
46  
47  
48 372 The total number of scheduled patients to be recruited is 300, on the basis of the following  
49  
50 373 hypotheses:

- 51  
52  
53 374 ➤ 80% of the included women should get pregnant (ALIFE study).<sup>11</sup>  
54  
55 375 ➤ Among women who will get pregnant, we suppose that the rate of achieved  
56  
57 376 pregnancy will be of 70% in the placebo group (PREFIX study).<sup>14</sup>  
58  
59  
60

1  
2  
3 377 To demonstrate a minimal clinically important difference of 15% in live-birth rates on HCQ  
4  
5 378 (i.e. a 50% relative risk reduction in pregnancy loss), we need to enroll 300 women for a  
6  
7  
8 379 power of 80%, and a two-tailed alpha risk of 5%.

9  
10  
11 380 The anticipated duration of recruitment is 3 years and the duration of participation of each  
12  
13 381 patient: from 7 to 29 months.

14  
15  
16 382

17  
18  
19 383 *Analyses plan*

20  
21  
22 384 Analyses will be firstly conducted on an intention to treat basis for all women who have  
23  
24 385 started pregnancy. Hierarchical analysis including three steps is planned :comparison of the  
25  
26 386 number of live and viable births, between the two treatment groups i) among all the women,  
27  
28 387 ii) among women without known APL antibodies, iii) among women without known  
29  
30 388 thrombophilia (APL or inherited thrombophilia). We plan to adjust for age and number of  
31  
32 389 previous losses if the difference between the two treatment groups is statistically significant ( $p$   
33  
34 390  $< .05$ ).

35  
36  
37  
38  
39 391 Secondary analyses will be conducted on an intention to treat mode:

40  
41  
42 392 For all included women, comparison of the number of live and viable births between the two  
43  
44 393 treatment groups.

45  
46  
47  
48 394 Among women who will get pregnant:

49  
50  
51 395 ➤ Measure of treatment effect in women at higher risk of further miscarriage,  
52  
53 396 according to the presence of thrombophilia, past history of intrauterine fetal  
54  
55 397 death after 10 week's gestation, past history of miscarriage,  $> 3$  previous  
56  
57 398 miscarriage or, no previous newborn baby,

- 1  
2  
3 399           ➤ Comparison between the two treatment groups of the occurrence of several  
4  
5 400           obstetrical events (miscarriage and intrauterine fetal death, vasculo placental  
6  
7 401           disease, premature birth),  
8  
9  
10 402           ➤ Comparison between the two treatment groups of newborn clinical data  
11  
12 403           (gestation time at delivery, birth weight adjusted to the gestation time, number  
13  
14 404           of newborn babies living at 28 days and congenital abnormalities.

15  
16  
17  
18 405 A "per-protocol analysis" (primary endpoint) will include only patients properly exposed to  
19  
20 406 the study treatment, that is i) at least during a whole menstrual cycle before pregnancy onset  
21  
22 407 and until 10 weeks of amenorrhea ii) compliance  $\geq$  80%.

23  
24  
25 408 No unblinded interim analysis is planned.

26  
27  
28 409 The biological collection will be carried out by the CRB of the CHRU of BREST and  
29  
30 410 integrated into the collection "thrombosis" declared to the Ministry (2008-214/ DC-2009-  
31  
32 411 925).

33  
34  
35  
36 412

## 37 38 39 413 **DISCUSSION**

40  
41  
42  
43 414 To date, there has not yet been an optimal therapy with conclusive clinical benefit for  
44  
45 415 unexplained RM, in the absence or presence of inherited thrombophilia. Providing some  
46  
47 416 psychological support seems to be the only available therapy for women with unexplained  
48  
49 417 RM. Although the probability of a further normal pregnancy seems high, (~70% at age 32  
50  
51 418 after 3 consecutive miscarriages),<sup>58</sup>the proposed therapeutic interventions are sometimes  
52  
53 419 excessive, (e.g. possible side effects) and costly (e.g. intravenous immunoglobulins, assisted  
54  
55 420 procreation). Therefore, it is of utmost importance to investigate other therapeutic options.  
56  
57  
58  
59  
60

1  
2  
3 421 In RM women with high titers of APL antibodies but without any other previous clinical  
4  
5 422 event listed in APS (thrombotic or obstetric event), benefit of antithrombotic treatment  
6  
7 423 (aspirin or LMWH) remains controversial. Clinical benefit of HCQ has not been demonstrated  
8  
9 424 in prospective studies with robust methodology.<sup>59</sup>  
10  
11  
12

13 425 In conclusion, the benefit/risk ratio and low cost are strong incentives for assessment of HCQ  
14  
15 426 in unexplained RM irrespective of maternal thrombophilic status.  
16  
17  
18

19 427  
20  
21

## 22 428 **ETHICS, REGULATORY APPROVALS AND DISSEMINATION**

23  
24

25 429 Agreement from the French National Public Health and Drug Security Agency (160765A-22)  
26  
27 430 and ethical approval from the Committee for the Protection of Persons of NORD-OUEST I  
28  
29 431 (2016-001330-97) have been obtained on November 4<sup>th</sup> 2016 and March 2<sup>nd</sup> 2017,  
30  
31 432 respectively. This trial is registered at [www.ClinicalTrials.gov](http://www.ClinicalTrials.gov) as # NCT0316513. and at the  
32  
33 433 French National Health and Drug Safety Agency as EudraCT # 2016-001330-97. The  
34  
35 434 necessary trial insurance is provided by HDI Gerling Industrie Versicherung (PARIS).  
36  
37 435 Protocol version V3.0, November 30, 2017  
38  
39  
40  
41

42 436  
43  
44

## 45 437 **SPONSORSHIP**

46  
47  
48

49 438 This study is sponsored by Brest University Hospital, 2 Avenue Foch,  
50  
51

52 439 29609 Brest Cédex, France.  
53  
54

55 440  
56  
57

## 58 441 **PATIENT AND PUBLIC INVOLVEMENT**

59  
60

1  
2  
3 442 Patients were not involved in the design of the study.  
4  
5

6 443  
7  
8

9  
10 444 **Acknowledgements**  
11

12  
13 445 The authors thank the clinical network Gynobs<sup>29</sup> of the gynecologists and obstetricians of  
14  
15 446 West Brittany and the national research network GOCIC “Réseau Gynécologie Obstétricale  
16  
17 447 des Centres d’Investigation Clinique”. They also thank Zarrin Alavi (Inserm, CIC 1412) for  
18  
19 448 proofreading and all the other investigators of the study: Dr Tiphaine Raia-Barjat  
20  
21 449 (Gynecology, Saint-Etienne), Dr Nathalie Lesavre (Centre d’Investigation Clinique, Hôpital  
22  
23 450 Nord, Marseille), Arsène Mékinian (APHP, hospital Saint-Antoine, Paris), Norbert Winer  
24  
25 451 (Gynecology, Nantes), Charles Bellot and Gaelle Le Foll (Gynecology, Quimper), Céline  
26  
27 452 Pimentel (gynecology, Rennes), Aude Bourtembourg (Gynecology, Besançon) Véronique  
28  
29 453 Debarge ( Gynecology, Lille), Dominique Luton (APHP, Bichat).  
30  
31  
32

33  
34 454  
35

36  
37 455 **Contributors**  
38

39  
40 456 EP conceived and designed the study. EP drafted the original grant proposal and trial  
41  
42 457 protocol. LDSM provides methodological and statistical expertise. GM has assisted in  
43  
44 458 developing the protocol, helped with implementation and has responsibilities for day-to-day  
45  
46 459 running of the trial including participant recruitment, data collection and liaising with other  
47  
48 460 sites. JH and PM have helped with protocol implementation. CB, CC, FB, VLS, GPB, DM  
49  
50 461 have participated in the design of the study. VC coordinates treatment production and  
51  
52 462 dispensation. All authors critically reviewed and approved the final version of the manuscript.  
53  
54  
55

56  
57 463  
58  
59  
60

1  
2  
3 464 **Funding** The study was supported by a grant from the French Ministry of Health (PHRCN-  
4  
5 465 17-0573).  
6  
7

8 466  
9  
10  
11 467 Funder and sponsor had no role in study design; collection, management, analysis and,  
12  
13 468 interpretation of data; writing of the report and decision to submit the report for publication.  
14  
15  
16

17 469  
18  
19  
20 470 **Competing interests for all trial investigators** None declared.  
21  
22

23 471  
24  
25  
26 472 **Patient consent** Obtained.  
27  
28

29 473  
30  
31  
32 474 The data that will support the findings of this study will be available when the findings will be  
33  
34 475 published in a peer-review journal, from the corresponding author, upon reasonable request.  
35  
36

37 476  
38  
39  
40 477  
41  
42  
43  
44  
45  
46  
47  
48  
49  
50  
51  
52  
53  
54  
55  
56  
57  
58  
59  
60

## 478 **References**

- 479 1. Branch DW, Gibson M, Silver RM. Clinical practice. Recurrent miscarriage. *N Engl J Med.*  
480 2010;363(18):1740-1747.
- 481 2. Ogasawara M, Aoki K, Okada S, Suzumori K. Embryonic karyotype of abortuses in  
482 relation to the number of previous miscarriages. *Fertil Steril* 2000; 73: 300–4.
- 483 3. Rey E, Kahn SR, David M, Shrier I. Thrombophilic disorders and fetal loss: a meta-  
484 analysis. *Lancet.* 2003;361(9361):901-908.
- 485 4. Isermann B, Sood R, Pawlinski R, Zogg M, Kalloway S, Degen JL, et al. The  
486 thrombomodulin-protein C system is essential for the maintenance of pregnancy, *Nat. Med.* 9  
487 (3) (2003) 331–337.
- 488 5. Li W, Zheng X, Gu JM, Ferrel GLI, Brady M, Esmon NL, et al, Extraembryonic expression  
489 of EPCR is essential for embryonic viability, *Blood* 106 (8) (2005) 2716–2722.
- 490 6. Laude I, Rongièrès-Bertrand C, Boyer-Neumann C, et al. Circulating procoagulant  
491 microparticles in women with unexplained pregnancy loss: a new insight. *Thromb Haemost.*  
492 2001;85(1):18-21.
- 493 7. Rai R, Tuddenham E, Backos M, et al. Thromboelastography, whole-blood haemostasis  
494 and recurrent miscarriage. *Hum Reprod.* 2003;18(12):2540-2543.
- 495 8. de Saint Martin L, Duchemin J, Bohec C, et al. Increased thrombin generation measured in  
496 the presence of thrombomodulin in women with early pregnancy loss. *Fertil Steril.*  
497 2011;95(5):1813-1815, e1.



- 1  
2  
3 498 9. Pasquier E, De Saint Martin L, Bohec C, Collet M, Dignat George F, Mottier D.  
4  
5 499 Unexplained pregnancy loss: a marker of basal endothelial dysfunction? *Fertil Steril*. 2013  
6  
7 500 Oct;100(4):1013-7.  
8  
9  
10 501 10. Kharazmi E, Dossus L, Rohrmann S, Kaaks R. Pregnancy loss and risk of cardiovascular  
11  
12 502 disease: a prospective population-based cohort study (EPIC-Heidelberg). *Heart*. 2011;  
13  
14 503 97(1):49-54.  
15  
16  
17  
18 504 11. Kaandorp SP, Goddijn M, van der Post JA, et al. Aspirin plus heparin or aspirin alone in  
19  
20 505 women with recurrent miscarriage. *N Engl J Med*. 2010; 362(17):1586-1596.  
21  
22  
23  
24 506 12. Clark P, Walker ID, Langhorne P, et al. SPIN (Scottish Pregnancy Intervention) study: a  
25  
26 507 multicenter, randomized controlled trial of low-molecular-weight heparin and low-dose  
27  
28 508 aspirin in women with recurrent miscarriage. *Blood*. 2010;115(21):4162-7.  
29  
30  
31  
32  
33 509 13. Visser J, Ulander VM, Helmerhorst FM, et al. Thromboprophylaxis for recurrent  
34  
35 510 miscarriage in women with or without thrombophilia. HABENOX: a randomised multicentre  
36  
37 511 trial. *Thromb Haemost*. 2011;105(2):295-301.  
38  
39  
40  
41 512 14. Pasquier E, de Saint Martin L, Bohec C, Chauleur C, Bretelle F, Marhic G, et al.  
42  
43 513 Enoxaparin for prevention of unexplained recurrent miscarriage: a multicenter randomized  
44  
45 514 double-blind placebo-controlled trial. *Blood*. 2015;125: 2200-5.  
46  
47  
48  
49 515 15. Rodger MA, Hague WM, Kingdom J, et al; TIPPS Investigators. Antepartum dalteparin  
50  
51 516 versus no antepartum dalteparin for the prevention of pregnancy complications in pregnant  
52  
53 517 women with thrombophilia (TIPPS): a multinational open-label randomised trial. *Lancet*.  
54  
55 518 2014;384(9955): 1673-1683.  
56  
57  
58  
59  
60

- 1  
2  
3 519 16. van den Boogaard E, Vissenberg R, Land JA, van Wely M, van der Post JA, Goddijn M,  
4  
5 520 Bisschop PH. Significance of (sub)clinical thyroid dysfunction and thyroid autoimmunity  
6  
7 521 before conception and in early pregnancy: a systematic review, *Hum. Reprod* 2011; 17(5):  
8  
9 522 605–619  
10  
11  
12  
13 523 17. Rai R, Regan L. Recurrent miscarriage. *Lancet*. 2006;368(9535):601-611.  
14  
15  
16 524 18. Figueiredo AS and Schumacher A. The T helper type 17/regulatory T cell paradigm in  
17  
18 525 pregnancy. *Immunology*. 2016; 148:13–21.  
19  
20  
21 526 19. Kang X, Zhang X, Liu Z, Xu H, Wang T, He L, Zhao A. Excessive TLR9 signaling  
22  
23 527 contributes to the pathogenesis of spontaneous abortion through impairment of Treg cell  
24  
25 528 survival by activation of Caspase 8/3. *Int Immunopharmacol*. 2015;29(2):285-92.  
26  
27  
28  
29 529 20. Porter TF, LaCoursiere Y, Scott JR. Immunotherapy for recurrent miscarriage. *Cochrane*  
30  
31 530 *Database Syst Rev*. 2006;2:CD000112  
32  
33  
34  
35 531 21. Egerup P, Lindschou J, Gluud C, Christiansen OB; ImmuReM IPD Study Group. The  
36  
37 532 Effects of Intravenous Immunoglobulins in Women with Recurrent Miscarriages: A  
38  
39 533 Systematic Review of Randomised Trials with Meta-Analyses and Trial Sequential Analyses  
40  
41 534 Including Individual Patient Data. *PLoS One*. 2015 Oct 30;10(10):e0141588  
42  
43  
44  
45 535 22. Tang AW, Alfirevic Z, Turner MA, Drury JA, Small R, Quenby S. A feasibility trial of  
46  
47 536 screening women with idiopathic recurrent miscarriage for high uterine natural killer cell  
48  
49 537 density and randomizing to prednisolone or placebo when pregnant. *Hum Reprod*. 2013  
50  
51 538 Jul;28(7):1743-52  
52  
53  
54  
55 539 23. Liddell HS, Pattison NS, Zanderigo A. Recurrent miscarriage—outcome after supportive  
56  
57 540 care in early pregnancy. *Aust N Z J Obstet Gynaecol* 1991; 31: 320–22.  
58  
59  
60

- 1  
2  
3 541 24. Miyakis S, Lockshin MD, Atsumi T, et al. International consensus statement on an update  
4  
5 542 of the classification criteria for definite antiphospholipid syndrome (APS). *JThromb Haemost.*  
6  
7 543 2006;4(2):295-306.  
8  
9  
10 544 25. Laskin CA, Spitzer KA, Clark CA, Crowther MR, Ginsberg JS, Hawker GA, Kingdom  
11  
12  
13 545 JC, Barrett J, Gent M. Low molecular weight heparin and aspirin for recurrent pregnancy loss:  
14  
15 546 results from the randomized, controlled HepASA Trial. *J Rheumatol.* 2009 Feb;36(2):279-87.  
16  
17  
18 547 26. Wallace DJ. Does hydroxychloroquine sulphate prevent clot formation in systemic lupus  
19  
20  
21 548 erythematosus? *ArthritisRheum*1987; 30(12):1435–6.  
22  
23  
24 549 27. Johansson E, Forsberg K, Johnsson H. Clinical and experimental evaluation of the  
25  
26 550 thromboprophylactic effect of hydroxychloroquine sulphate after total hip  
27  
28 551 replacement. *Haemostasis*1981;10(2):89–96.  
29  
30  
31 552 28. Johnson R, Charnley J. Hydroxychloroquine in prophylaxis of pulmonary embolism  
32  
33 553 following hip arthroplasty. *Clin Orthop Relat Res* 1979;144:174–7.  
34  
35  
36 554 29. Carter AE, Eban R. Prevention of postoperative deep venous thrombosis in legs by orally  
37  
38 555 administered hydroxychloroquine sulphate. *Br Med J* 1974; 3:94-95.  
39  
40  
41  
42 556 30. Wu TK. Prophylaxis of deep venous thrombosis by hydroxychloroquine sulfate and  
43  
44 557 heparin. *Surg Gynecol Obstet* 1977;145:714–718.  
45  
46  
47  
48 558 31. Ruiz-Irastorza G, Egurbide MV, Pijoan JI, et al. Effect of antimalarials on thrombosis and  
49  
50 559 survival in patients with systemic lupus erythematosus. *Lupus* 2006; 15:577–583.  
51  
52  
53 560 32. Tektonidou MG, Laskari K, Panagiotakos DB, Moutsopoulos HM. Risk factors for  
54  
55 561 thrombosis and primary thrombosis prevention in patients with systemic lupus erythematosus  
56  
57 562 with or without antiphospholipid antibodies. *Arthritis Rheum* 2009; 61:29–36.  
58  
59  
60

- 1  
2  
3 563 33. Jung H, Bobba R, Su J, et al. The protective effect of antimalarial drugs on  
4  
5 564 thrombovascular events in systemic lupus erythematosus. *Arthritis Rheum* 2010; 62:863–868.  
6  
7  
8 565 34. Edwards MH, Pierangeli S, Liu X, et al. Hydroxychloroquine reverses thrombogenic  
9  
10 566 properties of antiphospholipid antibodies in mice. *Circulation* 1997; 96:4380–4384.  
11  
12  
13  
14 567 35. Schmidt-Tanguy A, et al. Anti-thrombotic effects of hydroxychloroquine in primary  
15  
16 568 antiphospholipid syndrome patients. *J Thromb Haemost.* 2013 Oct;11(10):1927-9  
17  
18  
19 569 36. Madow BP. Use of anti-malarial drugs as “desludging” agents in vascular disease  
20  
21 570 processes. *JAMA* 1960, 172:1630–1633.  
22  
23  
24  
25 571 37. Ernst E, Rose M, Lee R: Modification of trans-operative changes in blood fluidity by  
26  
27 572 hydroxy-chloroquine. A possible explanation for the drugs anti-thrombotic effect.  
28  
29 573 *Pharmatherapeutica* 1984, 4:48–52.  
30  
31  
32 574 38. Carter AE, Eban R, Perrett RD. Prevention of post-operative deep venous thrombosis and  
33  
34 575 pulmonary embolism. *Br Med J* 1971;1:312–314.  
35  
36  
37  
38 576 39. Espinola RG, Pierangeli SS, Gharavi AE, Harris EN, Ghara AE. Hydroxychloroquine  
39  
40 577 reverses platelet activation induced by human IgG antiphospholipid antibodies.  
41  
42 578 *ThrombHaemost.*2002;87(3):518–22.  
43  
44  
45  
46 579 40. Rand JH, Wu XX, Quinn AS, Chen PP, Hathcock JJ, Taatjes D J. Hydroxychloroquine  
47  
48 580 directly reduces the binding of antiphospholipid antibody-beta2-glycoprotein I complexes to  
49  
50 581 phospholipid bilayers. *Blood* 2008;112(5):1687–95.  
51  
52  
53  
54 582 41. Gerstein HC, Thorpe KE, Taylor DW, Haynes RB. The effectiveness of  
55  
56 583 hydroxychloroquine in patients with type 2 diabetes mellitus who are refractory to  
57  
58 584 sulfonylureas--a randomized trial. *Diabetes Res Clin Pract.* 2002 Mar;55(3):209-19.  
59  
60

- 1  
2  
3 585 42. Petri M, Lakatta C, Magder L, Goldman D. Effect of prednisone and hydroxychloroquine  
4  
5 586 on coronary artery disease risk factors in systemic lupus erythematosus: a longitudinal data  
6  
7 587 analysis. *AmJMed* 1994;96(3):254–9.
- 8  
9  
10 588 43. Virdis A, Tani C, Duranti E, et al. Early treatment with hydroxychloroquine prevents the  
11  
12 589 development of endothelial dysfunction in a murine model of systemic lupus erythematosus.  
13  
14 590 *Arthritis Res Ther.* 2015 Oct 6;17:277.
- 15  
16  
17 591 44. Le NT, Takei Y, Izawa-Ishizawa Y, Heo KS, Lee H, Smrcka AV, Miller BL, Ko KA,  
18  
19 592 Ture S, Morrell C, Fujiwara K, Akaike M, Abe J. Identification of activators of ERK5  
20  
21 593 transcriptional activity by high-throughput screening and the role of endothelial ERK5 in  
22  
23 594 vasoprotective effects induced by statins and antimalarial agents. *J Immunol.* 2014 Oct  
24  
25 595 1;193(7):3803-15.
- 26  
27  
28 596 45. Lafyatis R, York M, Marshak-Rothstein A: Antimalarial agents: closing the gate on Toll-  
29  
30 597 like receptors? *Arthritis Rheum* 2006; 54:3068–3070.
- 31  
32  
33 598 46. Kyburz D, Brentano F, Gay S: Mode of action of hydroxychloroquine in RA—evidence of  
34  
35 599 an inhibitory effect on Tolllike receptor signaling. *Nat Clin Pract Rheumatol* 2006; 2:458–  
36  
37 600 459.
- 38  
39  
40 601 47. Kuznik A, Bencina M, Svajger U, Jeras M, Rozman B, Jerala R. Mechanism of  
41  
42 602 endosomal TLR inhibition by antimalarial drugs and imidazoquinolines. *J Immunol.*  
43  
44 603 2011;186(8):4794-804.
- 45  
46  
47 604 48. Bygbjerg IC, Svenson M, Theander TG, Bendtzen K: Effect of antimalarial drugs on  
48  
49 605 stimulation and interleukin 2 production of human lymphocytes. *Int J Immunopharmacol*  
50  
51 606 1987; 9:513–519.
- 52  
53  
54  
55  
56  
57  
58  
59  
60

- 1  
2  
3 607 49. van den Borne BE, Dijkmans BA, de Rooij HH, et al.: Chloroquine and  
4  
5 608 hydroxychloroquine equally affect tumor necrosis factor-alpha, interleukin 6, and interferon-  
6  
7 609 gamma production by peripheral blood mononuclear cells. *J Rheumatol* 1997; 24:55–60.  
8  
9  
10  
11 610 50. Weber SM, Levitz SM: Chloroquine interferes with lipopolysaccharide-induced TNF-  
12  
13 611 alpha gene expression by a non lysosomotropic mechanism. *J Immunol* 2000; 165:1534–  
14  
15 612 1540.  
16  
17  
18 613 51. Broder A, Putterman C. Hydroxychloroquine use is associated with lower odds of  
19 614 persistently positive antiphospholipid antibodies and/or lupus anticoagulant in systemic lupus  
20  
21 615 erythematosus. *J Rheumatol*. 2013;40(1):30-3.  
22  
23  
24  
25  
26 616 52. Raschi E, Borghi MO, Grossi C, et al.: Toll-like receptors: another player in the  
27  
28 617 pathogenesis of the anti-phospholipid syndrome. *Lupus* 2008; 17:937–942.  
29  
30  
31  
32 618 53. Doring Y, Hurst J, Lorenz M, et al.: Human antiphospholipid antibodies induce TNF  
33  
34 619 alpha in monocytes via Toll-like receptor 8. *Immunobiology* 2010; 215:230–241.  
35  
36  
37 620 54. Berman J, Girardi G, Salmon JE: TNF-alpha is a critical effector and a target for therapy  
38  
39 621 in antiphospholipid antibody-induced pregnancy loss. *J Immunol* 2005; 174:485–490.  
40  
41  
42  
43 622 55 Kaplan YC, Ozsarfati J, Nickel C, Koren G. Reproductive outcomes following  
44  
45 623 hydroxychloroquine use for autoimmune diseases: a systematic review and meta-analysis. *Br*  
46  
47 624 *J Clin Pharmacol*. 2016 May;81(5):835-48.  
48  
49  
50 625 56. Götestam Skorpen C, Hoeltzenbein M, Tincani A, et al. The EULAR points to consider  
51  
52 626 for use of antirheumatic drugs before pregnancy, and during pregnancy and lactation. *Ann*  
53  
54 627 *Rheum Dis*. 2016 May;75(5):795-810.  
55  
56  
57  
58  
59  
60

- 1  
2  
3 628 57. Tarfaoui N, Autret-Leca E, Mazjoub S, et al. Hydroxychloroquine During Pregnancy: a  
4  
5 629 Review of Retinal Toxicity in the Newborns. *Thérapie* 2013; 68 (1): 43–47  
6  
7  
8 630 58. Brigham SA, Conlon C, Farquharson RG. A longitudinal study of pregnancy outcome  
9  
10 631 following idiopathic recurrent miscarriage. *Hum Reprod.* 1999;14(11):2868-2871.  
11  
12  
13  
14 632 59. Mekinian A, Lazzaroni MG, Kuzenko A, et al. The efficacy of hydroxychloroquine for  
15  
16 633 obstetrical outcome in anti-phospholipid syndrome: Data from a European multicenter  
17  
18 634 retrospective study. *Autoimmunity* 2015.14(6):498-502.  
19  
20  
21  
22 635

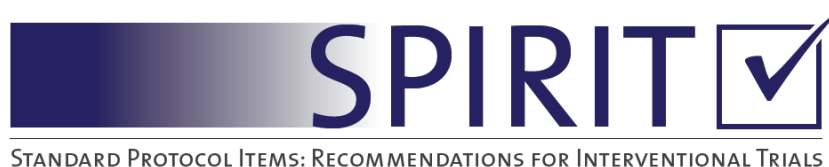

SPIRIT 2013 Checklist: Recommended items to address in a clinical trial protocol and related documents\*

| Section/item                                  | Item No | Description                                                                                                                                                                                                                                                                                                                                |
|-----------------------------------------------|---------|--------------------------------------------------------------------------------------------------------------------------------------------------------------------------------------------------------------------------------------------------------------------------------------------------------------------------------------------|
| <b>Administrative information</b>             |         |                                                                                                                                                                                                                                                                                                                                            |
| Title                                         | 1       | Descriptive title identifying the study design, population, interventions, and, if applicable, trial acronym reported on page 1                                                                                                                                                                                                            |
| Trial registration<br>reported on pages 3, 21 | 2a      | Trial identifier and registry name. If not yet registered, name of intended registry                                                                                                                                                                                                                                                       |
|                                               | 2b      | All items from the World Health Organization Trial Registration Data Set                                                                                                                                                                                                                                                                   |
| Protocol version                              | 3       | Date and version identifier reported on page 21                                                                                                                                                                                                                                                                                            |
| Funding                                       | 4       | Sources and types of financial, material, and other support reported on p 9, 23                                                                                                                                                                                                                                                            |
| Roles and responsibilities                    | 5a      | Names, affiliations, and roles of protocol contributors reported on p 1, 22                                                                                                                                                                                                                                                                |
|                                               | 5b      | Name and contact information for the trial sponsor reported on p 21                                                                                                                                                                                                                                                                        |
|                                               | 5c      | Role of study sponsor and funders, if any, in study design; collection, management, analysis, and interpretation of data; writing of the report; and the decision to submit the report for publication, including whether they will have ultimate authority over any of these activities reported on p 23                                  |
|                                               | 5d      | Composition, roles, and responsibilities of the coordinating centre, steering committee, endpoint adjudication committee, data management team, and other individuals or groups overseeing the trial, if applicable (see Item 21a for data monitoring committee) reported on the study protocol (supplementary file) on pages:15-17, 58-61 |
| <b>Introduction</b>                           |         |                                                                                                                                                                                                                                                                                                                                            |
| Background and rationale                      | 6a      | Description of research question and justification for undertaking the trial, including summary of relevant studies (published and unpublished) examining benefits and harms for each intervention reported on pages 5-9                                                                                                                   |
|                                               | 6b      | Explanation for choice of comparators reported on p 6,7                                                                                                                                                                                                                                                                                    |
| Objectives                                    | 7       | Specific objectives or hypotheses reported on page 10                                                                                                                                                                                                                                                                                      |
| Trial design                                  | 8       | Description of trial design including type of trial (eg, parallel group, crossover, factorial, single group), allocation ratio, and framework (eg, superiority, equivalence, noninferiority, exploratory) reported on page 11                                                                                                              |



## Methods: Participants, interventions, and outcomes

|    |                      |     |                                                                                                                                                                                                                                                                                                                                                                                                                                                            |
|----|----------------------|-----|------------------------------------------------------------------------------------------------------------------------------------------------------------------------------------------------------------------------------------------------------------------------------------------------------------------------------------------------------------------------------------------------------------------------------------------------------------|
| 1  |                      |     |                                                                                                                                                                                                                                                                                                                                                                                                                                                            |
| 2  |                      |     |                                                                                                                                                                                                                                                                                                                                                                                                                                                            |
| 3  |                      |     |                                                                                                                                                                                                                                                                                                                                                                                                                                                            |
| 4  | Study setting        | 9   | Description of study settings (eg, community clinic, academic hospital) and list of countries where data will be collected. Reference to where list of study sites can be obtained reported on pages 11, 22                                                                                                                                                                                                                                                |
| 5  |                      |     |                                                                                                                                                                                                                                                                                                                                                                                                                                                            |
| 6  |                      |     |                                                                                                                                                                                                                                                                                                                                                                                                                                                            |
| 7  |                      |     |                                                                                                                                                                                                                                                                                                                                                                                                                                                            |
| 8  | Eligibility criteria | 10  | Inclusion and exclusion criteria for participants. If applicable, eligibility criteria for study centres and individuals who will perform the interventions (eg, surgeons, psychotherapists) reported on pages 12-13                                                                                                                                                                                                                                       |
| 9  |                      |     |                                                                                                                                                                                                                                                                                                                                                                                                                                                            |
| 10 |                      |     |                                                                                                                                                                                                                                                                                                                                                                                                                                                            |
| 11 |                      |     |                                                                                                                                                                                                                                                                                                                                                                                                                                                            |
| 12 |                      |     |                                                                                                                                                                                                                                                                                                                                                                                                                                                            |
| 13 | Interventions        | 11a | Interventions for each group with sufficient detail to allow replication, including how and when they will be administered reported on pages 14                                                                                                                                                                                                                                                                                                            |
| 14 |                      |     |                                                                                                                                                                                                                                                                                                                                                                                                                                                            |
| 15 |                      |     |                                                                                                                                                                                                                                                                                                                                                                                                                                                            |
| 16 |                      | 11b | Criteria for discontinuing or modifying allocated interventions for a given trial participant (eg, drug dose change in response to harms, participant request, or improving/worsening disease) reported on page 17 and on page 48 of the study protocol (supplementary file)                                                                                                                                                                               |
| 17 |                      |     |                                                                                                                                                                                                                                                                                                                                                                                                                                                            |
| 18 |                      |     |                                                                                                                                                                                                                                                                                                                                                                                                                                                            |
| 19 |                      |     |                                                                                                                                                                                                                                                                                                                                                                                                                                                            |
| 20 |                      |     |                                                                                                                                                                                                                                                                                                                                                                                                                                                            |
| 21 |                      | 11c | Strategies to improve adherence to intervention protocols, and any procedures for monitoring adherence (eg, drug tablet return, laboratory tests) reported on page 46 of the study protocol (supplementary file)                                                                                                                                                                                                                                           |
| 22 |                      |     |                                                                                                                                                                                                                                                                                                                                                                                                                                                            |
| 23 |                      |     |                                                                                                                                                                                                                                                                                                                                                                                                                                                            |
| 24 |                      |     |                                                                                                                                                                                                                                                                                                                                                                                                                                                            |
| 25 |                      | 11d | Relevant concomitant care and interventions that are permitted or prohibited during the trial reported on page 15                                                                                                                                                                                                                                                                                                                                          |
| 26 |                      |     |                                                                                                                                                                                                                                                                                                                                                                                                                                                            |
| 27 |                      |     |                                                                                                                                                                                                                                                                                                                                                                                                                                                            |
| 28 | Outcomes             | 12  | Primary, secondary, and other outcomes, including the specific measurement variable (eg, systolic blood pressure), analysis metric (eg, change from baseline, final value, time to event), method of aggregation (eg, median, proportion), and time point for each outcome. Explanation of the clinical relevance of chosen efficacy and harm outcomes is strongly recommended reported on pages 16 and, on pages 33-34 of the study protocol (supplement) |
| 29 |                      |     |                                                                                                                                                                                                                                                                                                                                                                                                                                                            |
| 30 |                      |     |                                                                                                                                                                                                                                                                                                                                                                                                                                                            |
| 31 |                      |     |                                                                                                                                                                                                                                                                                                                                                                                                                                                            |
| 32 |                      |     |                                                                                                                                                                                                                                                                                                                                                                                                                                                            |
| 33 |                      |     |                                                                                                                                                                                                                                                                                                                                                                                                                                                            |
| 34 |                      |     |                                                                                                                                                                                                                                                                                                                                                                                                                                                            |
| 35 |                      |     |                                                                                                                                                                                                                                                                                                                                                                                                                                                            |
| 36 | Participant timeline | 13  | Time schedule of enrolment, interventions (including any run-ins and washouts), assessments, and visits for participants. A schematic diagram is highly recommended (see Figure) reported on page 15, 16 and on pages 34-44 of the study protocol                                                                                                                                                                                                          |
| 37 |                      |     |                                                                                                                                                                                                                                                                                                                                                                                                                                                            |
| 38 |                      |     |                                                                                                                                                                                                                                                                                                                                                                                                                                                            |
| 39 |                      |     |                                                                                                                                                                                                                                                                                                                                                                                                                                                            |
| 40 |                      |     |                                                                                                                                                                                                                                                                                                                                                                                                                                                            |
| 41 | Sample size          | 14  | Estimated number of participants needed to achieve study objectives and how it was determined, including clinical and statistical assumptions supporting any sample size calculations reported on page 18-19                                                                                                                                                                                                                                               |
| 42 |                      |     |                                                                                                                                                                                                                                                                                                                                                                                                                                                            |
| 43 |                      |     |                                                                                                                                                                                                                                                                                                                                                                                                                                                            |
| 44 |                      |     |                                                                                                                                                                                                                                                                                                                                                                                                                                                            |
| 45 | Recruitment          | 15  | Strategies for achieving adequate participant enrolment to reach target sample size reported on page 48 and 70 of the study protocol (supplementary file)                                                                                                                                                                                                                                                                                                  |
| 46 |                      |     |                                                                                                                                                                                                                                                                                                                                                                                                                                                            |
| 47 |                      |     |                                                                                                                                                                                                                                                                                                                                                                                                                                                            |
| 48 |                      |     |                                                                                                                                                                                                                                                                                                                                                                                                                                                            |

## Methods: Assignment of interventions (for controlled trials)

Allocation: reported on page 13-14 and on page 44 of the study protocol (supplementary file)

|    |                     |     |                                                                                                                                                                                                                                                                                                                                                          |
|----|---------------------|-----|----------------------------------------------------------------------------------------------------------------------------------------------------------------------------------------------------------------------------------------------------------------------------------------------------------------------------------------------------------|
| 52 |                     |     |                                                                                                                                                                                                                                                                                                                                                          |
| 53 | Sequence generation | 16a | Method of generating the allocation sequence (eg, computer-generated random numbers), and list of any factors for stratification. To reduce predictability of a random sequence, details of any planned restriction (eg, blocking) should be provided in a separate document that is unavailable to those who enrol participants or assign interventions |
| 54 |                     |     |                                                                                                                                                                                                                                                                                                                                                          |
| 55 |                     |     |                                                                                                                                                                                                                                                                                                                                                          |
| 56 |                     |     |                                                                                                                                                                                                                                                                                                                                                          |
| 57 |                     |     |                                                                                                                                                                                                                                                                                                                                                          |
| 58 |                     |     |                                                                                                                                                                                                                                                                                                                                                          |
| 59 |                     |     |                                                                                                                                                                                                                                                                                                                                                          |
| 60 |                     |     |                                                                                                                                                                                                                                                                                                                                                          |

|    |                       |     |                                                                         |
|----|-----------------------|-----|-------------------------------------------------------------------------|
| 1  |                       |     |                                                                         |
| 2  | Allocation            | 16b | Mechanism of implementing the allocation sequence (eg, central          |
| 3  | concealment           |     | telephone; sequentially numbered, opaque, sealed envelopes),            |
| 4  | mechanism             |     | describing any steps to conceal the sequence until interventions are    |
| 5  |                       |     | assigned                                                                |
| 6  |                       |     |                                                                         |
| 7  | Implementation        | 16c | Who will generate the allocation sequence, who will enrol participants, |
| 8  |                       |     | and who will assign participants to interventions                       |
| 9  |                       |     |                                                                         |
| 10 | Blinding              | 17a | Who will be blinded after assignment to interventions (eg, trial        |
| 11 | (masking)             |     | participants, care providers, outcome assessors, data analysts), and    |
| 12 |                       |     | how                                                                     |
| 13 | reported on page 14   |     |                                                                         |
| 14 | and on page 44        |     |                                                                         |
| 15 | of the study protocol | 17b | If blinded, circumstances under which unblinding is permissible, and    |
| 16 | (supplementary file)  |     | procedure for revealing a participant's allocated intervention during   |
| 17 |                       |     | the trial                                                               |
| 18 |                       |     |                                                                         |

### Methods: Data collection, management, and analysis

|    |                                |     |                                                                          |
|----|--------------------------------|-----|--------------------------------------------------------------------------|
| 21 | Data collection                | 18a | Plans for assessment and collection of outcome, baseline, and other      |
| 22 | methods                        |     | trial data, including any related processes to promote data quality (eg, |
| 23 |                                |     | duplicate measurements, training of assessors) and a description of      |
| 24 |                                |     | study instruments (eg, questionnaires, laboratory tests) along with      |
| 25 |                                |     | their reliability and validity, if known. Reference to where data        |
| 26 |                                |     | collection forms can be found, if not in the protocol                    |
| 27 |                                |     | reported on pages 68, 69 of the study protocol (supplementary file)      |
| 28 |                                | 18b | Plans to promote participant retention and complete follow-up,           |
| 29 |                                |     | including list of any outcome data to be collected for participants who  |
| 30 |                                |     | discontinue or deviate from intervention protocols reported on p 48-49   |
| 31 |                                |     | of the study protocol                                                    |
| 32 | Data                           | 19  | Plans for data entry, coding, security, and storage, including any       |
| 33 | management                     |     | related processes to promote data quality (eg, double data entry;        |
| 34 |                                |     | range checks for data values). Reference to where details of data        |
| 35 |                                |     | management procedures can be found, if not in the protocol               |
| 36 |                                |     | reported on pages 68-69 of the study protocol (supplementary file)       |
| 37 | Statistical                    | 20a | Statistical methods for analysing primary and secondary outcomes.        |
| 38 | methods                        |     | Reference to where other details of the statistical analysis plan can be |
| 39 |                                |     | found, if not in the protocol                                            |
| 40 |                                |     |                                                                          |
| 41 | reported on pages 19-20 and on | 20b | Methods for any additional analyses (eg, subgroup and adjusted           |
| 42 | pages 62-64 of the study       |     | analyses)                                                                |
| 43 | protocol                       |     |                                                                          |
| 44 |                                | 20c | Definition of analysis population relating to protocol non-adherence     |
| 45 |                                |     | (eg, as randomised analysis), and any statistical methods to handle      |
| 46 |                                |     | missing data (eg, multiple imputation)                                   |
| 47 |                                |     |                                                                          |
| 48 |                                |     |                                                                          |
| 49 |                                |     |                                                                          |
| 50 |                                |     |                                                                          |
| 51 |                                |     |                                                                          |

### Methods: Monitoring

|    |                 |     |                                                                      |
|----|-----------------|-----|----------------------------------------------------------------------|
| 52 |                 |     |                                                                      |
| 53 | Data monitoring | 21a | Composition of data monitoring committee (DMC); summary of its role  |
| 54 |                 |     | and reporting structure; statement of whether it is independent from |
| 55 |                 |     | the sponsor and competing interests; and reference to where further  |
| 56 |                 |     | details about its charter can be found, if not in the protocol.      |
| 57 |                 |     | Alternatively, an explanation of why a DMC is not needed             |
| 58 |                 |     |                                                                      |
| 59 |                 |     |                                                                      |
| 60 |                 |     |                                                                      |

reported on page 17-18 and on page  
61 of the study protocol.

|    |          |     |                                                                              |
|----|----------|-----|------------------------------------------------------------------------------|
| 1  |          |     |                                                                              |
| 2  |          | 21b | Description of any interim analyses and stopping guidelines, including       |
| 3  |          |     | who will have access to these interim results and make the final             |
| 4  |          |     | decision to terminate the trial reported on page 18 and on page 62 of the    |
| 5  |          |     | study protocol (supplementary file)                                          |
| 6  | Harms    | 22  | Plans for collecting, assessing, reporting, and managing solicited and       |
| 7  |          |     | spontaneously reported adverse events and other unintended effects           |
| 8  |          |     | of trial interventions or trial conduct reported on pages 16-17 and on pages |
| 9  |          |     | 55-60 of the study protocol (supplementary file)                             |
| 10 | Auditing | 23  | Frequency and procedures for auditing trial conduct, if any, and             |
| 11 |          |     | whether the process will be independent from investigators and the           |
| 12 |          |     | sponsor reported on page 66 of the study protocol (supplementary file)       |
| 13 |          |     |                                                                              |
| 14 |          |     |                                                                              |

## Ethics and dissemination

|    |                          |     |                                                                                   |
|----|--------------------------|-----|-----------------------------------------------------------------------------------|
| 15 |                          |     |                                                                                   |
| 16 |                          |     |                                                                                   |
| 17 | Research ethics          | 24  | Plans for seeking research ethics committee/institutional review board            |
| 18 | approval                 |     | (REC/IRB) approval reported on pages 3, 21 and on pages 46,59,61                  |
| 19 |                          |     | of the study protocol                                                             |
| 20 | Protocol                 | 25  | Plans for communicating important protocol modifications (eg,                     |
| 21 | amendments               |     | changes to eligibility criteria, outcomes, analyses) to relevant parties          |
| 22 |                          |     | (eg, investigators, REC/IRBs, trial participants, trial registries, journals,     |
| 23 |                          |     | regulators) reported on page 66 and 70 of the study protocol (supplementary file) |
| 24 |                          |     |                                                                                   |
| 25 |                          |     |                                                                                   |
| 26 | Consent or assent        | 26a | Who will obtain informed consent or assent from potential trial                   |
| 27 |                          |     | participants or authorised surrogates, and how (see Item 32)                      |
| 28 | reported on page         |     |                                                                                   |
| 29 | 67 of the study protocol | 26b | Additional consent provisions for collection and use of participant data          |
| 30 |                          |     | and biological specimens in ancillary studies, if applicable                      |
| 31 |                          |     |                                                                                   |
| 32 |                          |     |                                                                                   |
| 33 | Confidentiality          | 27  | How personal information about potential and enrolled participants will           |
| 34 |                          |     | be collected, shared, and maintained in order to protect confidentiality 70       |
| 35 |                          |     | before, during, and after the trial reported on page 65 of the study protocol     |
| 36 |                          |     |                                                                                   |
| 37 | Declaration of           | 28  | Financial and other competing interests for principal investigators for           |
| 38 | interests                |     | the overall trial and each study site reported on page 23                         |
| 39 |                          |     |                                                                                   |
| 40 | Access to data           | 29  | Statement of who will have access to the final trial dataset, and                 |
| 41 |                          |     | disclosure of contractual agreements that limit such access for                   |
| 42 |                          |     | investigators reported on pages 64-65 of the study protocol ( supplementary file) |
| 43 |                          |     |                                                                                   |
| 44 |                          |     |                                                                                   |
| 45 | Ancillary and            | 30  | Provisions, if any, for ancillary and post-trial care, and for                    |
| 46 | post-trial care          |     | compensation to those who suffer harm from trial participation                    |
| 47 |                          |     | reported on page 67 of the study protocol (supplementary file)                    |
| 48 | Dissemination            | 31a | Plans for investigators and sponsor to communicate trial results to               |
| 49 | policy                   |     | participants, healthcare professionals, the public, and other relevant            |
| 50 |                          |     | groups (eg, via publication, reporting in results databases, or other             |
| 51 |                          |     | data sharing arrangements), including any publication restrictions                |
| 52 |                          |     | reported on page 70 of the study protocol (supplementary file)                    |
| 53 |                          | 31b | Authorship eligibility guidelines and any intended use of professional            |
| 54 |                          |     | writers reported on page 70 of the study protocol (supplementary file)            |
| 55 |                          |     |                                                                                   |
| 56 |                          |     |                                                                                   |
| 57 |                          | 31c | Plans, if any, for granting public access to the full protocol, participant-      |
| 58 |                          |     | level dataset, and statistical code                                               |
| 59 |                          |     |                                                                                   |
| 60 |                          |     |                                                                                   |

## Appendices

|                            |    |                                                                                                                                                                                                                                     |
|----------------------------|----|-------------------------------------------------------------------------------------------------------------------------------------------------------------------------------------------------------------------------------------|
| Informed consent materials | 32 | Model consent form and other related documentation given to participants and authorised surrogates given as a supplementary file                                                                                                    |
| Biological specimens       | 33 | Plans for collection, laboratory evaluation, and storage of biological specimens for genetic or molecular analysis in the current trial and for future use in ancillary studies, if applicable reported on p 35, 39 of the protocol |

---

\*It is strongly recommended that this checklist be read in conjunction with the SPIRIT 2013 Explanation & Elaboration for important clarification on the items. Amendments to the protocol should be tracked and dated. The SPIRIT checklist is copyrighted by the SPIRIT Group under the Creative Commons "[Attribution-NonCommercial-NoDerivs 3.0 Unported](#)" license.

For peer review only
